# Supplementary material for: Superacidic aluminum azido species: precursors to triazolyl dimers, trimers and tetramers
Source: Royal Society of Chemistry journal article supplement (doi:10.1039/d5qi00038f), 2025-01-01
Supplement: d5qi00038f1.pdf [file d5qi00038f1.pdf]

## *Electronic Supplementary Information*

# **Superacidic Aluminum Azido Species and Reagent-Controlled Self-Assembly of Triazolyl Dimers, Trimers and Tetramers†**

Shaoying Ju,<sup>†a</sup> Jingjie Tan,<sup>†a</sup> Ting Chen,<sup>\*a</sup> Weili Yan,<sup>b</sup> Ning Xi,<sup>a</sup> Douglas W. Stephan<sup>\*a,c</sup> and Yile Wu<sup>\*a</sup>

<sup>a</sup> Institute of Drug Discovery Technology, Ningbo University, Ningbo 315211, Zhejiang, China.

E-mail: chenting2@nbu.edu.cn (T. Chen); wuyile@nbu.edu.cn (Y. Wu)

<sup>b</sup> Pinghu Institute of Advanced Materials, Zhejiang University of Technology, Pinghu 314200, Zhejiang, China

<sup>c</sup> Department of Chemistry, University of Toronto, 80 St. George St, Toronto, ON, M5S3H6, Canada.

E-mail: douglas.stephan@utoronto.ca (D. W. Stephan)

<sup>†</sup>S. Y. Ju and J. J. Tan contributed equally to this work.

## **Table of Contents**

|                                                         |     |
|---------------------------------------------------------|-----|
| General Considerations .....                            | S2  |
| Experimental Procedures .....                           | S2  |
| Synthesis of compound <b>1</b> .....                    | S2  |
| Synthesis of compound <b>2</b> .....                    | S3  |
| Synthesis of compound <b>3</b> .....                    | S3  |
| Synthesis of compound <b>4, 5</b> and <b>6</b> .....    | S4  |
| Synthesis of compound <b>7, 8</b> and <b>9</b> .....    | S5  |
| Gutmann - Beckett methods .....                         | S6  |
| Spectroscopic Data .....                                | S8  |
| X-ray Crystallographic Data .....                       | S23 |
| Computational Details .....                             | S30 |
| Reference .....                                         | S32 |
| Cartesian Coordinates of the Optimized Geometries ..... | S33 |

## General Considerations

All experiments were carried out under inert gas atmosphere by using Schlenk-type glassware or in an Ar-filled glove box. Toluene, n-Hexane and Deuterated solvents ( $C_6D_6$ ) were dried with sodium/potassium alloy prior to use and stored with  $3\text{\AA}$  molecular sieves. All solvents were stored under argon atmosphere.  $Al(C_6F_5)_3$ <sup>[S1]</sup>,  $[HAl(C_6F_5)_2]_2$ <sup>[S2]</sup> and  $iPr-NHC$ <sup>[S3]</sup>(IPr) were synthesized according to the literature methods. NMR spectra were recorded on a Bruker Advance 500 ( $^1H$ : 500 MHz,  $^{13}C$ : 125 MHz,  $^{19}F$ : 470 MHz,  $^{31}P$ : 202 MHz) spectrometer at 298 K. Data are presented as follows: chemical shift, multiplicity (s = singlet, d = doublet, t = triplet, q = quartet, m = multiplet, br = broad), coupling constant in hertz (Hz), integration. HRMS were recorded on a Thermo Scientific TM Q-Exactive Plus<sup>TM</sup> mass spectrometer. Single-crystal X-ray diffraction data were collected on a Bruker D8 QUEST diffractometer using Cu ( $60W$ , Diamond,  $\mu K\alpha = 12.894\text{ mm}^{-1}$ ) micro-focus X-ray sources. Using Olex2<sup>[S4]</sup>, the structure was solved with the XT<sup>[S5]</sup> structure solution program using Intrinsic Phasing and refined with the XL<sup>[S6]</sup> refinement package using Least Squares minimization.

## Experimental Procedures

### Synthesis of compound 1

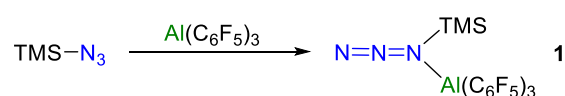

Scheme S1-1: Synthesis of 1

In the glovebox, a toluene solution (5 mL) of  $[Al(C_6F_5)_3] \cdot 0.5\text{ tol}$  (574 mg, 1 mmol) was added dropwisely into a toluene solution (5 mL) of TMS-N<sub>3</sub> (115 mg, 1 mmol) at room temperature. The reaction mixture was stirred at ambient temperature for 30 min. After removed solvent under vacuum, the resulting solids were washed with n-Hexane ( $3 \times 2\text{ mL}$ ). After evaporation to dryness, 1 was obtained as white solids (578 mg, 90% yield).

**Single crystals** (colorless) suitable for X-ray analysis were obtained from the toluene solution at  $-30\text{ }^\circ\text{C}$  for 12 hours.

**$^1H$  NMR** (500 MHz,  $C_6D_6$ , ppm):  $\delta$  0.27 (d,  $J = 2.4\text{ Hz}$ , 9H, Si( $CH_3$ )<sub>3</sub>).

**$^{13}C\{^1H\}$  NMR** (125 MHz,  $C_6D_6$ , ppm):  $\delta$  2.38 (s, Si( $CH_3$ )<sub>3</sub>), 111.81 (br, Al-C), 136.47~138.44 (m,  $m-C_6F_5$ ), 141.64~143.63 (m,  $p-C_6F_5$ ), 149.51~151.37 (m,  $o-C_6F_5$ ).

**$^{19}F\{^1H\}$  NMR** (470 MHz,  $C_6D_6$ , ppm):  $\delta$  -123.0 (br, 4F,  $o-C_6F_5$ ), -150.0 (t,  $J = 19.9\text{ Hz}$ , 2F,  $p-C_6F_5$ ), -160.1 (br, 4F,  $m-C_6F_5$ ).

**HRMS**(m/z):  $[M+MeCN+H]^+$  calcd. for  $C_{23}H_{13}AlF_{15}N_4Si^+$ , 685.0480; found: 685.0505.

**FT-IR** (solid,  $cm^{-1}$ ): 2170.3 (N=N stretching), 1643.6, 1510.9, 1442.1, 1358.2 (N=N stretching), 1263.8, 1192.6, 1068.9, 952.5, 835.5.

## Synthesis of compound 2

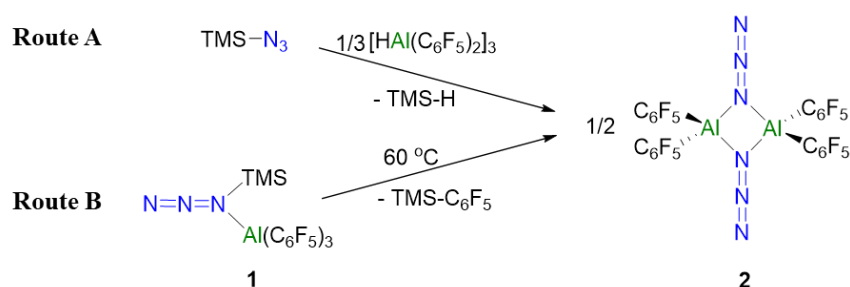

Scheme S1-2: Synthesis of **2**

**Route A:** In the glovebox, a toluene solution (2 mL) of TMS-N<sub>3</sub> (23mg, 0.2 mmol) was added dropwise into a toluene solution (2 mL) of [HAl(C<sub>6</sub>F<sub>5</sub>)<sub>2</sub>]<sub>3</sub> (72.4 mg, 0.07 mmol). After stirring for 30 minutes at room temperature, the resulted solution was dried under vacuum to afford white powders of **2** in 90% yield (72.6 mg). The signal of TMS-H was monitored by NMR in situ.

**Route B:** In the glovebox, a toluene solution (5 mL) of **1** (128 mg, 0.2 mmol) was heated to 60 °C for 12 hours to afford white powders of **2** in 82% yield (66 mg). The signal of TMS-C<sub>6</sub>F<sub>5</sub> was monitored by NMR in situ.

**Single crystals** (colorless) suitable for X-ray analysis were obtained by storing a toluene solution of **2** at -30 °C for 12 hours.

**<sup>13</sup>C{<sup>1</sup>H} NMR** (125 MHz, C<sub>6</sub>D<sub>6</sub>, ppm): δ 105.32 (br, Al-C), 134.60~136.31 (m, *m*-C<sub>6</sub>F<sub>5</sub>), 140.69~142.39 (m, *p*-C<sub>6</sub>F<sub>5</sub>), 147.08~148.55 (m, *o*-C<sub>6</sub>F<sub>5</sub>).

**<sup>19</sup>F{<sup>1</sup>H} NMR** (470 MHz, C<sub>6</sub>D<sub>6</sub>, ppm): δ -124.3 (br, 4F, *o*-C<sub>6</sub>F<sub>5</sub>), -146.7 (br, 2F, *p*-C<sub>6</sub>F<sub>5</sub>), -157.7 (br, 4F, *m*-C<sub>6</sub>F<sub>5</sub>).

**HRMS(m/z):** [1/2M+H]<sup>+</sup> calcd. for C<sub>12</sub>HAIF<sub>10</sub>N<sub>3</sub><sup>+</sup>: 403.9821, found: 403.9835.

**FT-IR** (solid, cm<sup>-1</sup>): 2174.0 (N≡N stretching), 1643.6, 1510.2, 1454.6, 1364.8 (N=N stretching), 1261.8, 1071.1, 955.5, 721.8.

## Synthesis of compound 3

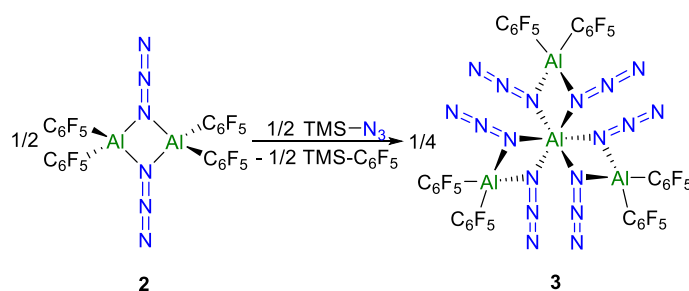

Scheme S1-3: Synthesis of **3**

In the glovebox, a toluene solution (2 mL) of TMS-N<sub>3</sub> (11.5 mg, 0.1 mmol) was added dropwise into a toluene solution (5 mL) of **2** (80.5 mg, 0.1 mmol) and then the reaction mixture was heated at 80 °C for 3 days. The precipitate was collected and washed with n-Hexane (3×1.0 mL). After drying under vacuum, white solids of **3** (49.7 mg, 73% yield) were obtained.

**Single crystals** (colorless) suitable for X-ray analysis were obtained by storing a toluene

solution of **3** at -30 °C for 2 hours.

$^{13}\text{C}\{^1\text{H}\}$  NMR (125 MHz,  $\text{C}_6\text{D}_6$ , ppm):  $\delta$  100.54 (td,  $J = 23.0, 3.6$  Hz, Al-C), 136.57~138.57 (m,  $m\text{-C}_6\text{F}_5$ ), 140.64~142.65 (m,  $p\text{-C}_6\text{F}_5$ ), 145.11~147.08 (m,  $o\text{-C}_6\text{F}_5$ ).

$^{19}\text{F}\{^1\text{H}\}$  NMR (470 MHz,  $\text{C}_6\text{D}_6$ , ppm):  $\delta$  -139.1 (br, 4F,  $o\text{-C}_6\text{F}_5$ ), -154.1 (t,  $J = 20.8$  Hz, 2F,  $p\text{-C}_6\text{F}_5$ ), -162.3 (br, 4F,  $m\text{-C}_6\text{F}_5$ ).

HRMS(m/z):  $[\text{M}-(\text{C}_6\text{F}_5)_2\text{AlN}_3+\text{H}]^+$  calcd. for  $\text{C}_{24}\text{HAl}_3\text{F}_{20}\text{N}_{15}^+$ : 959.9660, found: 959.9671.

FT-IR (solid,  $\text{cm}^{-1}$ ): 2168.9 (N $\equiv$ N stretching), 721.8, 1513.7, 1449.9, 1360.3 (N=N stretching), 1251.8, 1071.4, 952.6, 845.9.

## Synthesis of compound **4**, **5** and **6**

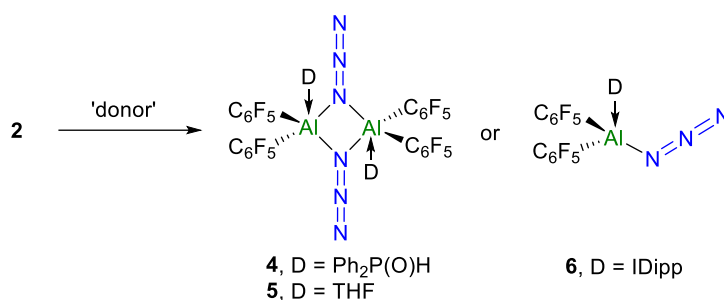

Scheme S1-4: Synthesis of **4**, **5** and **6**

In the glovebox, a toluene solution (2 mL) of **D** (for **4**,  $\text{Ph}_2\text{P}(\text{O})\text{H}$ , 40.4 mg, 0.2 mmol; for **5**, THF, 14.4 mg, 0.2 mmol; for **6**, IDipp, 77.3 mg, 0.2 mmol) was added dropwise into a toluene solution (2 mL) of **2** (80.5 mg, 0.1 mmol). After stirring for 1 hour at room temperature, the resulting solutions were dried under vacuum to afford the corresponding adducts **4**, **5** or **6** as white powders in good yield (**4**, 76%, 91.9 mg; **5**, 83%, 78.8 mg; **6**, 80%, 126.6 mg).

**Single crystals** (colorless) suitable for X-ray analysis were obtained by storing a toluene solution of **4**, **5** and **6** at -30 °C for 12 hours.

## **4**

$^1\text{H}$  NMR (500 MHz,  $\text{C}_6\text{D}_6$ , ppm):  $\delta$  6.83 (br, 4H,  $o\text{-C}_6\text{H}_5$ ), 6.95 (t, 2H,  $p\text{-C}_6\text{H}_5$ ), 7.13 (d,  $J = 537.8$  Hz, 1H, P-H), 7.13 (br, 4H,  $m\text{-C}_6\text{H}_5$ ).

$^{13}\text{C}\{^1\text{H}\}$  NMR (125 MHz,  $\text{C}_6\text{D}_6$ , ppm): 122.63 (d,  $J = 109.8$  Hz, P-C), 129.65 (d,  $J = 14.3$  Hz,  $o\text{-C}_6\text{H}_5$ ), 131.58 (d,  $J = 13.6$  Hz,  $m\text{-C}_6\text{H}_5$ ), 135.15 (d,  $J = 3.2$  Hz,  $p\text{-C}_6\text{H}_5$ ), 135.96~138.30 (m,  $m\text{-C}_6\text{F}_5$ ), 140.74~142.95 (m,  $p\text{-C}_6\text{F}_5$ ), 149.27~151.38 (m,  $o\text{-C}_6\text{F}_5$ ).

$^{19}\text{F}\{^1\text{H}\}$  NMR (470 MHz,  $\text{C}_6\text{D}_6$ , ppm):  $\delta$  -123.3 (br, 4F,  $o\text{-C}_6\text{F}_5$ ), 153.3 (t,  $J = 19.8$  Hz, 2F,  $p\text{-C}_6\text{F}_5$ ), -161.5 (br, 4F,  $m\text{-C}_6\text{F}_5$ ).

$^{31}\text{P}\{^1\text{H}\}$  NMR (202 MHz,  $\text{C}_6\text{D}_6$ , ppm):  $\delta$  34.5 (s, P-H).

$^{31}\text{P}$  NMR (202 MHz,  $\text{C}_6\text{D}_6$ , ppm):  $\delta$  34.5 (d,  $J = 539.7$  Hz, P-H).

HRMS(m/z):  $[\frac{1}{2}\text{M}+2\text{CH}_3\text{OH}+\text{Na}]^+$  calcd. for  $\text{C}_{26}\text{H}_{19}\text{AlF}_{10}\text{N}_3\text{O}_3\text{PNa}^+$ : 692.0712, found: 692.0720.

FT-IR (solid,  $\text{cm}^{-1}$ ): 2134.8 (N $\equiv$ N stretching), 1640.7, 1508.2, 1438.4, 1356.5 (N=N stretching), 1286.0, 1144.8, 1054.9, 950.2.

## 5

$^1\text{H NMR}$  (500 MHz, Tol- $d_6$ , ppm):  $\delta$  0.98 (s, 4H,  $\text{CH}_2(\text{THF})$ ), 3.33(s, 4H,  $\text{CH}_2(\text{THF})$ ).

$^{13}\text{C}\{^1\text{H}\}$  NMR (125 MHz, Tol- $d_6$ , ppm): 25.86 (s,  $\text{CH}_2(\text{THF})$ ), 71.56 (s,  $\text{CH}_2(\text{THF})$ );  $\text{Al}(\text{C}_6\text{F}_5)_2$  not listed.

$^{19}\text{F}\{^1\text{H}\}$  NMR (470 MHz, Tol- $d_6$ , ppm):  $\delta$  -123.5 (br, 4F,  $o\text{-C}_6\text{F}_5$ ), 151.2 (br, 2F,  $p\text{-C}_6\text{F}_5$ ), -160.4 (br, 4F,  $m\text{-C}_6\text{F}_5$ ).

HRMS(m/z):  $[\frac{1}{2}\text{M}+2\text{CH}_3\text{CN}+\text{Na}]^+$  calcd. for  $\text{C}_{20}\text{H}_{14}\text{AlF}_{10}\text{N}_5\text{ONa}^+$ : 580.0746, found: 580.0750.

FT-IR (solid,  $\text{cm}^{-1}$ ): 2149.6 ( $\text{N}\equiv\text{N}$  stretching), 1640.9, 1510.7, 1446.0, 1358.7 ( $\text{N}=\text{N}$  stretching), 1270.7, 1068.4, 953.6, 842.4.

## 6

$^1\text{H NMR}$  (500 MHz,  $\text{C}_6\text{D}_6$ , ppm): 0.80 (d,  $J = 6.1$  Hz, 12H,  $\text{CH}(\text{CH}_3)_2$ ), 1.17 (d,  $J = 6.7$  Hz, 12H,  $\text{CH}(\text{CH}_3)_2$ ), 2.68 (sept,  $J = 6.7$  Hz, 4H,  $\text{CH}(\text{CH}_3)_2$ ), 6.39 (s, 2H, N-CH-), 6.87 (d,  $J = 7.8$  Hz, 4H, Ar-H),  $\delta$  7.08 (t,  $J = 7.8$  Hz, 2H, Ar-H).

$^{13}\text{C}\{^1\text{H}\}$  NMR (125 MHz,  $\text{C}_6\text{D}_6$ , ppm)  $\delta$  21.71, 26.48 (s,  $\text{CH}(\text{CH}_3)_2$ ), 28.99 (s,  $\text{CH}(\text{CH}_3)_2$ ), 124.24 (s, ArC), 126.14 (s, ArC), 128.35 (s, ArC), 131.59 (s, ArC), 133.23 (s, -N-CH-), 137.79~138.87 (m,  $m\text{-C}_6\text{F}_5$ ), 140.60~142.40 (m,  $p\text{-C}_6\text{F}_5$ ), 145.68 (s, -NCN), 148.09~149.08 (m,  $o\text{-C}_6\text{F}_5$ ).

$^{19}\text{F}\{^1\text{H}\}$  NMR (470 MHz,  $\text{C}_6\text{D}_6$ , ppm):  $\delta$  -120.4 (br, 4F,  $o\text{-C}_6\text{F}_5$ ), -154.0 (t,  $J = 19.9$  Hz, 2F,  $p\text{-C}_6\text{F}_5$ ), -161.8 (br, 4F,  $m\text{-C}_6\text{F}_5$ ).

HRMS(m/z):  $[\text{M}+\text{Na}]^+$  calcd. for  $\text{C}_{39}\text{H}_{36}\text{AlF}_{10}\text{N}_5\text{Na}^+$ : 814.2519, found: 814.2531.

FT-IR (solid,  $\text{cm}^{-1}$ ): 2151.8 ( $\text{N}\equiv\text{N}$  stretching), 1637.5, 1509.2, 1441.9, 1387.7 ( $\text{N}=\text{N}$  stretching), 1387.7, 1118.4, 1059.0, 957.1.

## Synthesis of compound 7, 8 and 9

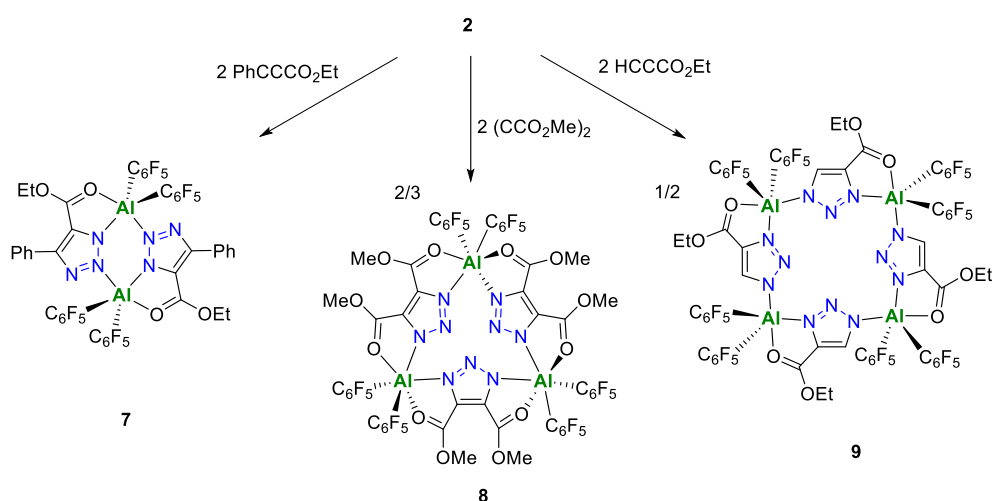

Scheme S1-5: Synthesis of 7, 8 and 9

A mixture of **2** (40.3 mg, 0.05 mmol),  $\text{R}^2\text{C}\equiv\text{CR}^1$  (for **7**,  $\text{R}^1=\text{Ph}$ ,  $\text{R}^2=\text{CO}_2\text{Et}$  17.4mg, 0.1mmol; for **8**,  $\text{R}^1=\text{R}^2=\text{CO}_2\text{Et}$  14.2mg, 0.1mmol; for **9**,  $\text{R}^1=\text{H}$ ,  $\text{R}^2=\text{CO}_2\text{Et}$  9.8mg, 0.1mmol) and benzene

(2 mL) was stirred under ambient temperature for 1 hour. the resulting solutions were dried under vacuum to afford the Complexes as white powders in good yield (**7**, 85%, 49 mg; **8**, 87%, 47.4 mg; **9**, 76%, 38 mg).

**Single crystals** (colorless) suitable for X-ray analysis were obtained by storing a solution of Click products (**7**, **8** and **9**) in mixed solvent of benzene and n-Hexane at -30 °C for 2 hours.

## 7

**<sup>1</sup>H NMR** (500 MHz, C<sub>6</sub>D<sub>6</sub>, ppm): δ 0.81 (t, *J* = 7.1 Hz, 3H, CH<sub>3</sub>), 3.94 (q, *J* = 6.7 Hz, 2H, -CH<sub>2</sub>-CH<sub>3</sub>), 6.81 (t, *J* = 7.6 Hz, 2H, Ar-*H*), 6.89 (t, *J* = 7.6 Hz, 1H, Ar-*H*), 7.22 (d, *J* = 7.5 Hz, 2H, Ar-*H*).

**<sup>13</sup>C{<sup>1</sup>H} NMR** (125 MHz, C<sub>6</sub>D<sub>6</sub>, ppm): δ 13.63 (s, CH<sub>3</sub>), 64.40 (s, -CH<sub>2</sub>-CH<sub>3</sub>), 80.56 (s, C=C), 91.06 (s, C=C), 115.80 (br, Al-C), 118.87 (s, Ar-C), 128.81, (s, Ar-C), 131.44 (s, Ar-C), 133.28 (s, Ar-C), 136.29~138.33 (m, *m*-C<sub>6</sub>F<sub>5</sub>), 140.57~142.58 (m, *p*-C<sub>6</sub>F<sub>5</sub>), 149.11~151.14 (m, *o*-C<sub>6</sub>F<sub>5</sub>), 156.49 (s, C=O).

**<sup>19</sup>F{<sup>1</sup>H} NMR** (470 MHz, C<sub>6</sub>D<sub>6</sub>, ppm): δ -123.1 (br, 4F, *o*-C<sub>6</sub>F<sub>5</sub>), -153.6 (t, *J* = 20.1 Hz, 2F, *p*-C<sub>6</sub>F<sub>5</sub>), -161.5 (br, 4F, *m*-C<sub>6</sub>F<sub>5</sub>).

**HRMS**(*m/z*): [1/2M+H]<sup>+</sup> calcd. for C<sub>23</sub>H<sub>11</sub>AlF<sub>10</sub>N<sub>3</sub>O<sub>2</sub><sup>+</sup>: 578.0502, found: 578.0516.

**FT-IR** (solid, cm<sup>-1</sup>): 1704.8, 1532.9, 1444.2, 1369.1, 1287.4, 1192.1, 1018.5, 948.6.

## 8

**<sup>1</sup>H NMR** (500 MHz, C<sub>6</sub>D<sub>6</sub>, ppm): δ 3.02 (s, 18H, CH<sub>3</sub>).

**<sup>13</sup>C{<sup>1</sup>H} NMR** (125 MHz, C<sub>6</sub>D<sub>6</sub>, ppm): δ 52.59 (CH<sub>3</sub>), 75.05 (C=C), 152.09 (MeO<sub>2</sub>C); Al(C<sub>6</sub>F<sub>5</sub>)<sub>2</sub> not listed.

**<sup>19</sup>F{<sup>1</sup>H} NMR** (470 MHz, C<sub>6</sub>D<sub>6</sub>, ppm): δ -139.1 (br, 4F, *o*-C<sub>6</sub>F<sub>5</sub>), -154.0 (t, *J* = 20.1 Hz, 2F, *p*-C<sub>6</sub>F<sub>5</sub>), -162.3 (br, 4F, *m*-C<sub>6</sub>F<sub>5</sub>).

**HRMS**(*m/z*): [1/3M+CH<sub>3</sub>CN+Na]<sup>+</sup> calcd. for C<sub>20</sub>H<sub>9</sub>AlF<sub>10</sub>N<sub>4</sub>O<sub>4</sub>Na<sup>+</sup>: 609.0172, found: 609.0181.

**FT-IR** (solid, cm<sup>-1</sup>): 1614.9, 1509.9, 1434.2, 1380.2, 1263.2, 1133.1, 1066.3, 953.5.

## 9

**<sup>1</sup>H NMR** (500 MHz, C<sub>6</sub>D<sub>6</sub>, ppm): δ 0.89 (t, *J* = 7.1 Hz, 3H, CH<sub>3</sub>), 3.78, 4.11 (br, 2H, -CH<sub>2</sub>-CH<sub>3</sub>). 7.86 (s, 1H, HC≡CCO<sub>2</sub>Et).

**<sup>13</sup>C{<sup>1</sup>H} NMR** (125 MHz, C<sub>6</sub>D<sub>6</sub>, ppm): δ 13.34 (s, CH<sub>3</sub>), 68.18 (s, -CH<sub>2</sub>-CH<sub>3</sub>), 112.96 (br, Al-C), 130.48 (s, HC=CCO<sub>2</sub>Et), 136.23 (s, HC=CCO<sub>2</sub>Et) 136.24~138.39 (m, *m*-C<sub>6</sub>F<sub>5</sub>), 140.66~143.13 (m, *p*-C<sub>6</sub>F<sub>5</sub>), 148.74~151.10 (m, *o*-C<sub>6</sub>F<sub>5</sub>), 167.86 (s, C=O).

**<sup>19</sup>F{<sup>1</sup>H} NMR** (470 MHz, C<sub>6</sub>D<sub>6</sub>, ppm): δ -123.2, 125.34 (br, 4F, *o*-C<sub>6</sub>F<sub>5</sub>), -151.73, 156.20 (t, *J* = 19.7 Hz, 2F, *p*-C<sub>6</sub>F<sub>5</sub>), -160.11, 162.92 (br, 4F, *m*-C<sub>6</sub>F<sub>5</sub>).

**HRMS**(*m/z*): [1/4M+Na]<sup>+</sup> calcd. for C<sub>17</sub>H<sub>6</sub>AlF<sub>10</sub>N<sub>3</sub>O<sub>2</sub>Na<sup>+</sup>: 524.0008, found: 524.0021.

**FT-IR** (solid, cm<sup>-1</sup>): 1712.8, 1531.1, 1444.8, 1374.1, 1336.4, 1179.2, 1069.1, 953.6.

## Gutmann–Beckett methods

Et<sub>3</sub>PO (13.4 mg, 0.1mmol, 2.0 equiv) was added into a C<sub>6</sub>D<sub>6</sub> (0.6 mL) solution of **2** (40 mg, 0.05mmol, 1.0 equiv). The resulting mixtures were transferred to a NMR tube and <sup>31</sup>P NMR

spectrum was collected. The relationship  $AN = \{(\delta P_{sample} - \delta P_{ref(in\ hex)}(Et_3PO))\} \times 2.215$  was used to calculate AN values according to the literature reported [S7].

$^{31}P\{^1H\}$  NMR resonance of  $Et_3PO$ :  $\delta P_{ref(in\ hex)}(Et_3PO) = 41$

Induced  $^{31}P\{^1H\}$  NMR signal shift of  $\delta P(Et_3PO) - 2 = 78.24$ ,  $\Delta\delta = 37.24$ .  $AN = 82.4$

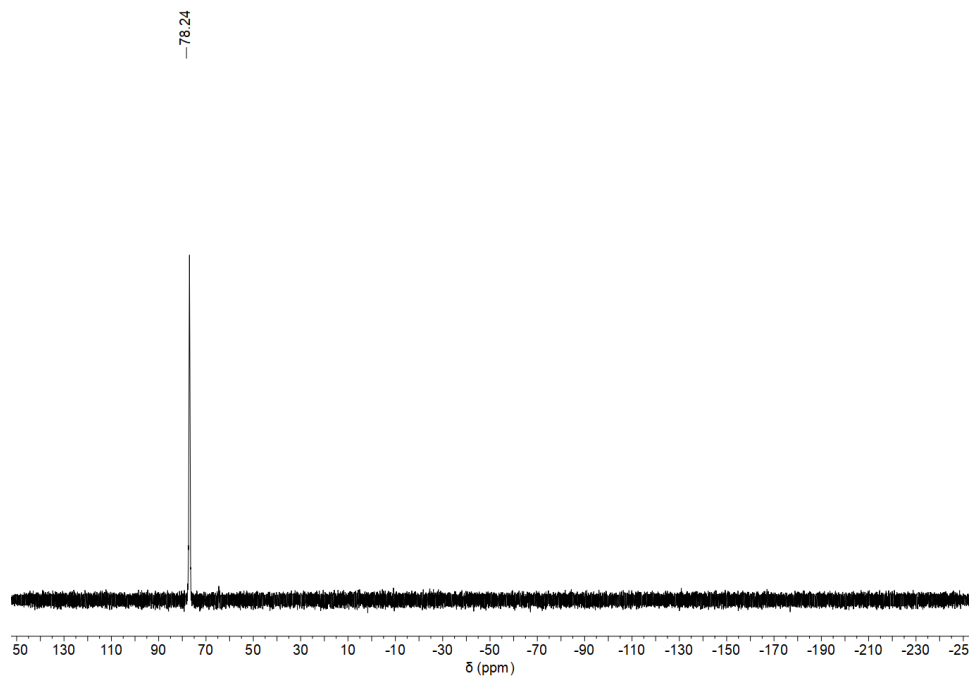

Figure S1-1.  $^{31}P\{^1H\}$  NMR spectrum of  $(Et_3PO)-2$  adduct in  $C_6D_6$

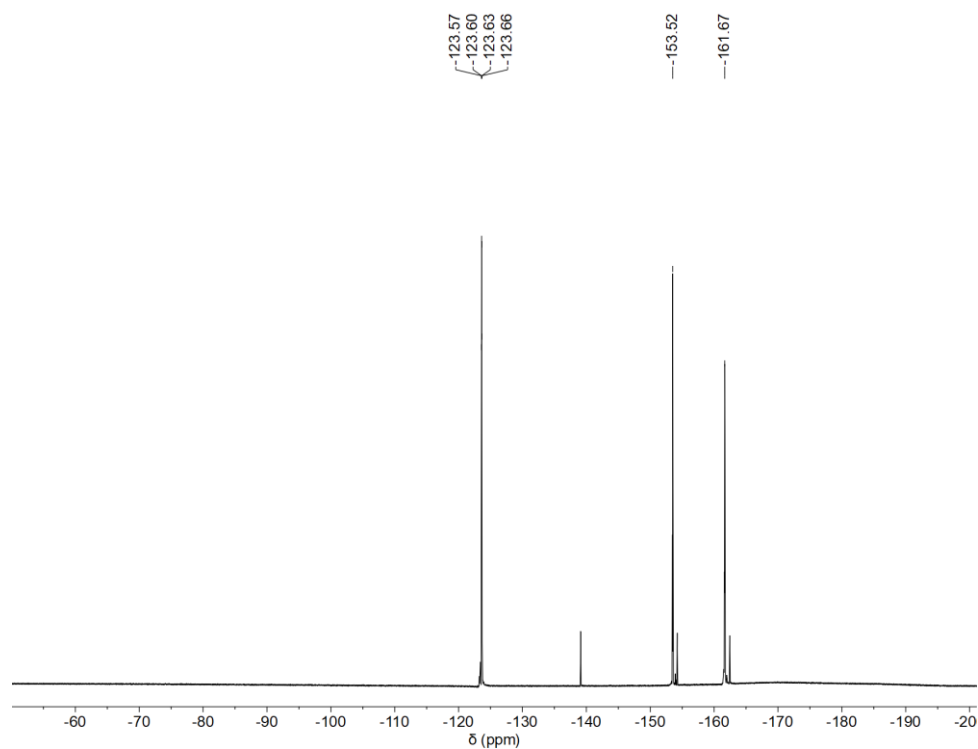

Figure S1-2.  $^{19}F\{^1H\}$  NMR spectrum of  $(Et_3PO)-2$  adduct in  $C_6D_6$

# Spectroscopic Data

## Spectra of 1

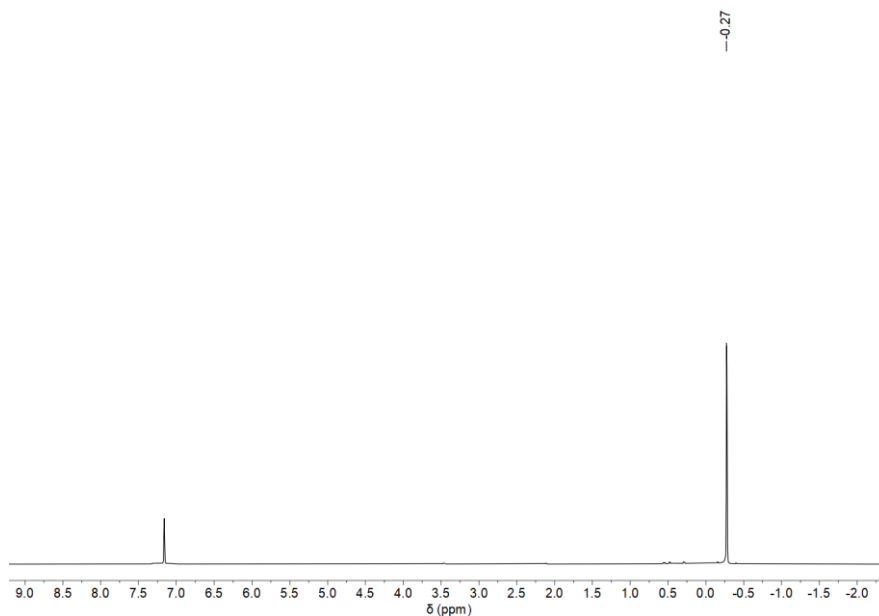

Figure S2-1.  $^1\text{H}$  NMR spectrum of 1 in  $\text{C}_6\text{D}_6$

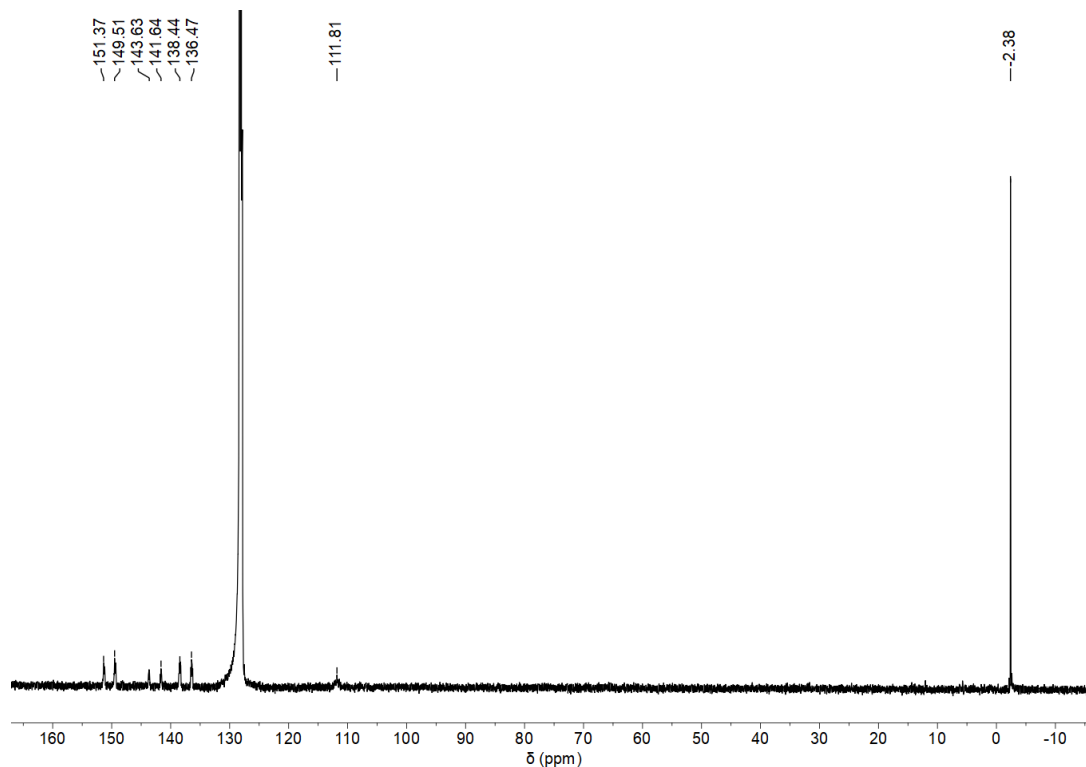

Figure S2-2.  $^{13}\text{C}\{^1\text{H}\}$  NMR spectrum of 1 in  $\text{C}_6\text{D}_6$



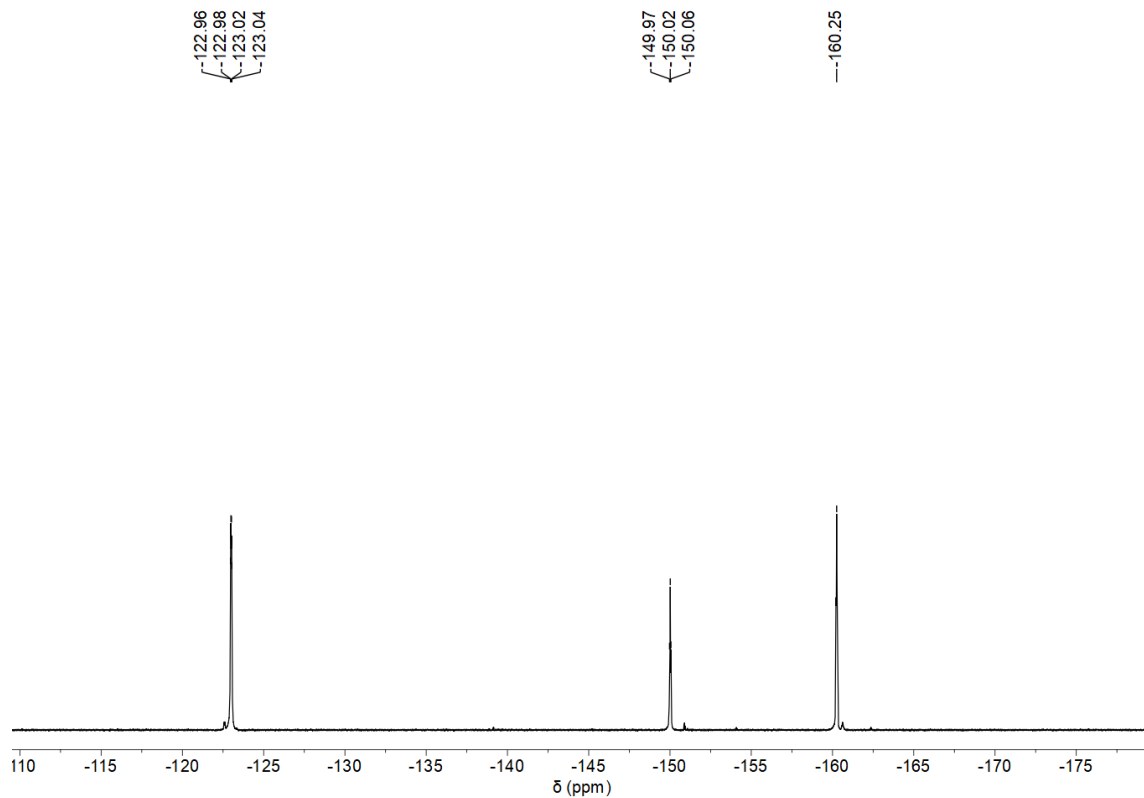

Figure S2-3.  $^{19}\text{F}\{^1\text{H}\}$  NMR spectrum of **1** in  $\text{C}_6\text{D}_6$

### Spectra of **2**

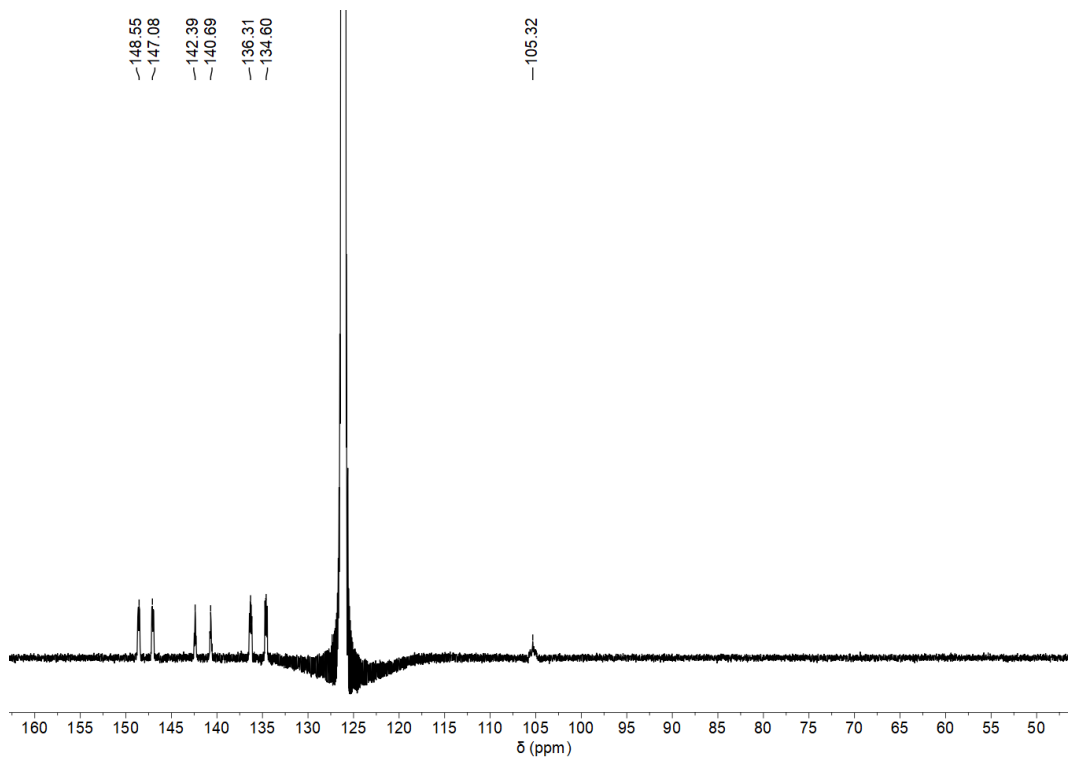

Figure S2-4.  $^{13}\text{C}\{^1\text{H}\}$  NMR spectrum of **2** in  $\text{C}_6\text{D}_6$

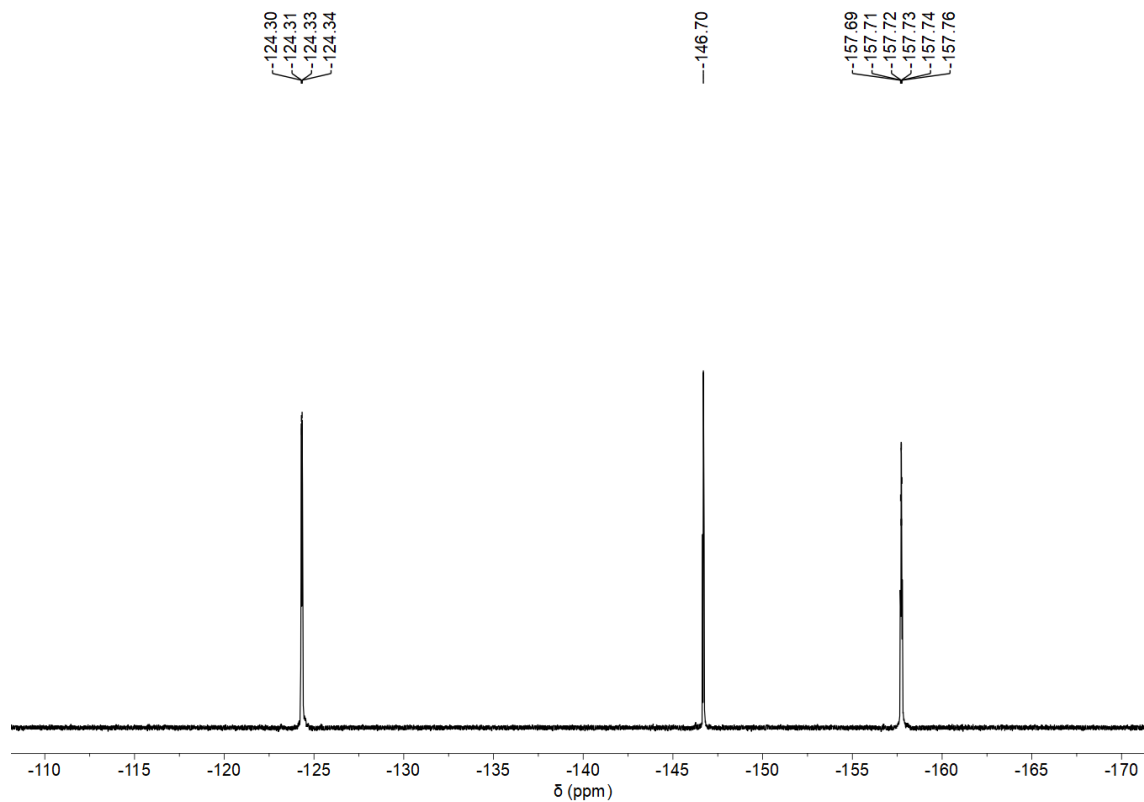

Figure S2-5.  $^{19}\text{F}\{^1\text{H}\}$  NMR spectrum of **2** in  $\text{C}_6\text{D}_6$

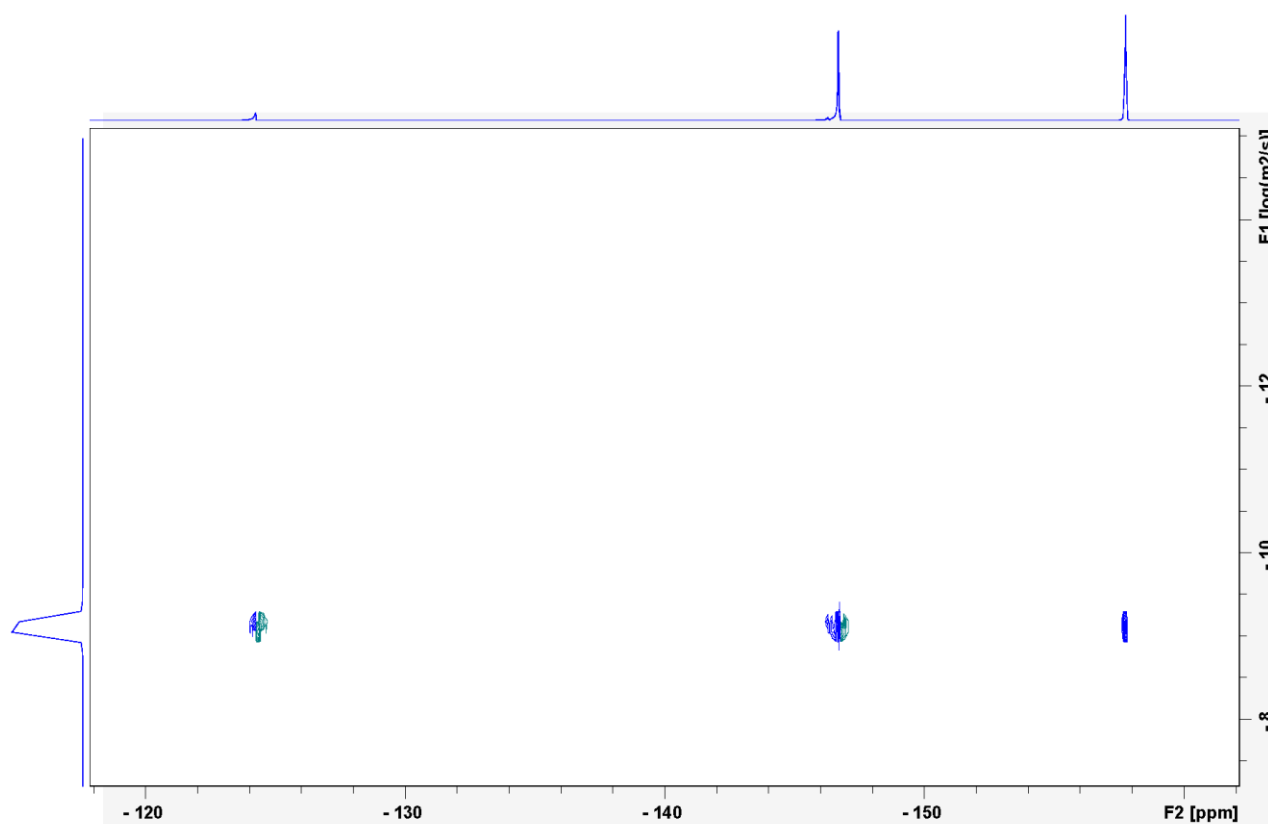

Figure S2-6.  $^{19}\text{F}$ - $^{19}\text{F}$  DOSY NMR spectrum of **2** in  $\text{C}_6\text{D}_6$

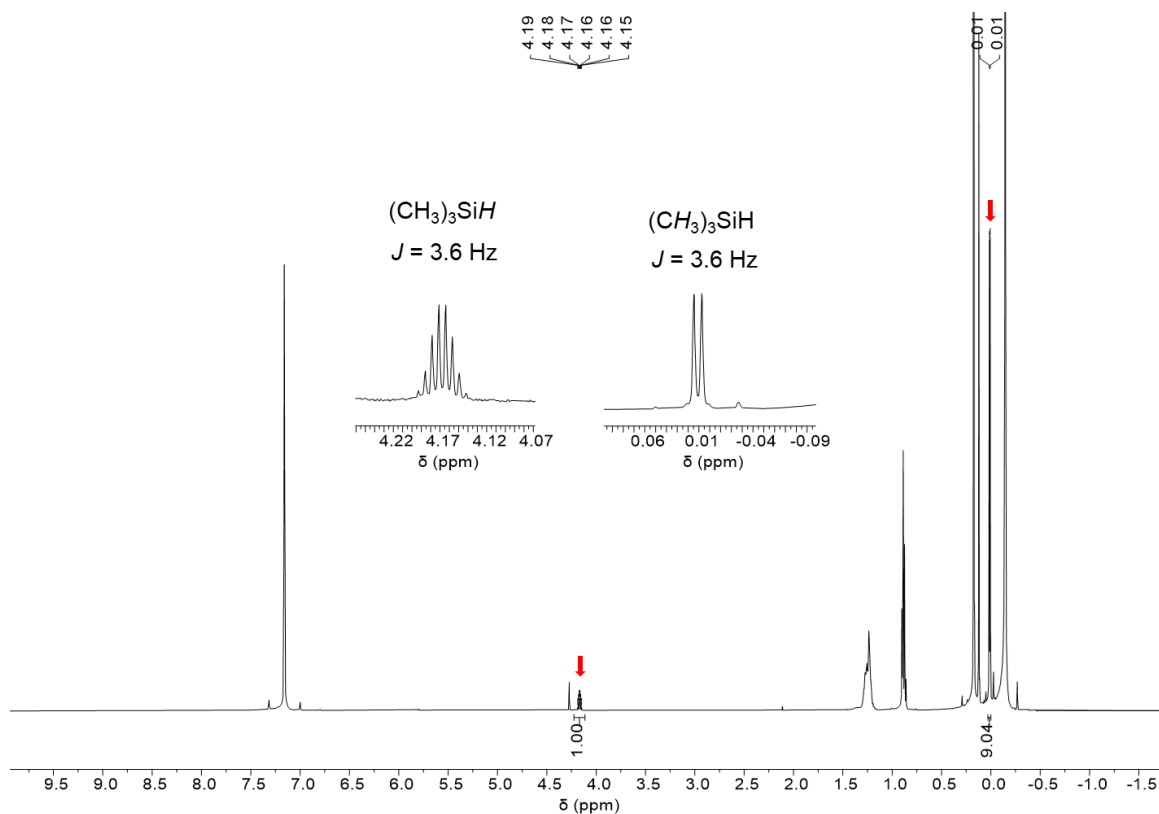

Figure S2-7. In-situ  $^1\text{H}$  NMR spectrum of **route A** in  $\text{C}_6\text{D}_6$

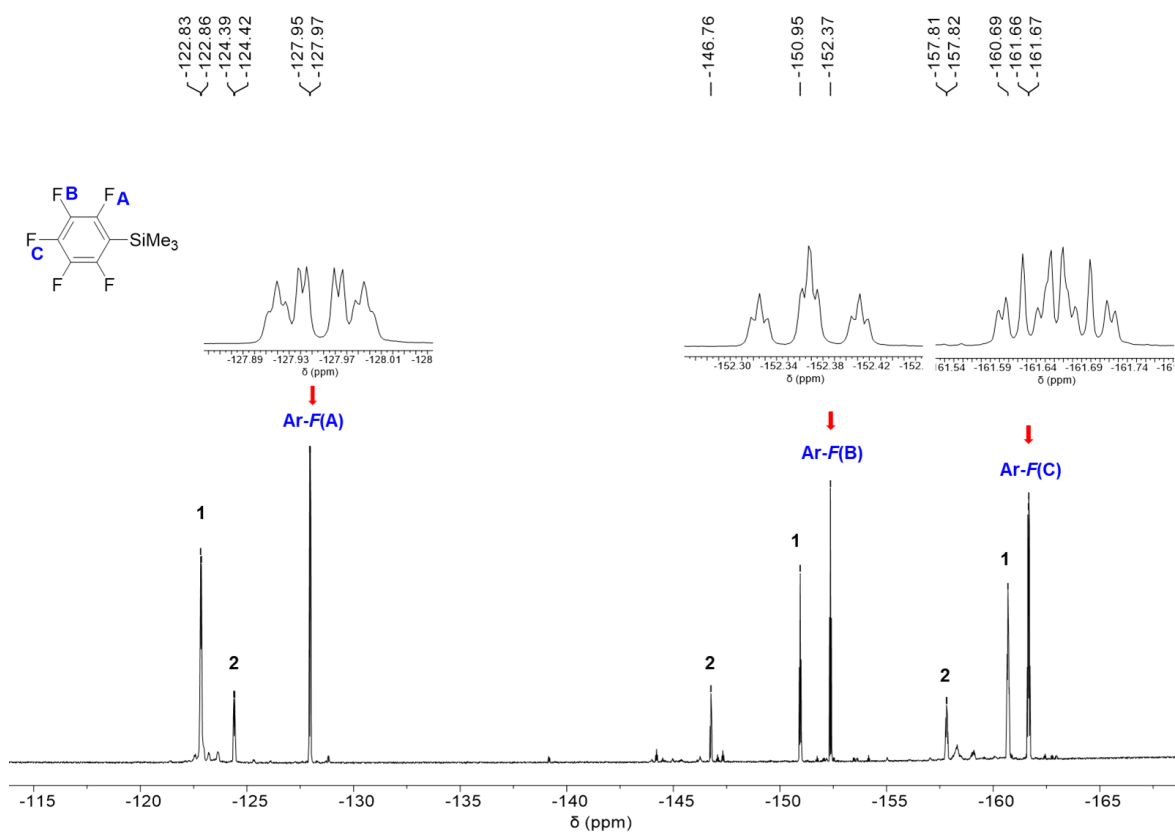

Figure S2-8. In-situ  $^{19}\text{F}\{^1\text{H}\}$  NMR spectrum of **route B** in  $\text{C}_6\text{D}_6$

## Spectra of 3

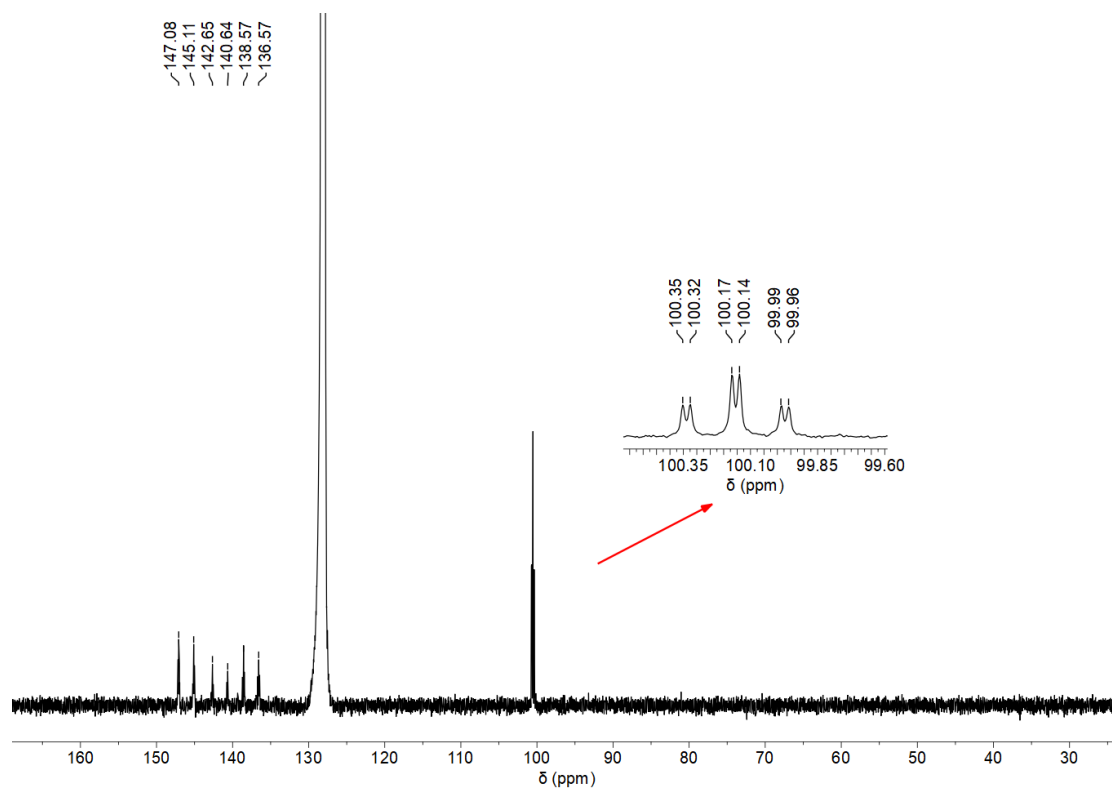

Figure S2-9.  $^{13}\text{C}\{^1\text{H}\}$  NMR spectrum of **3** in  $\text{C}_6\text{D}_6$

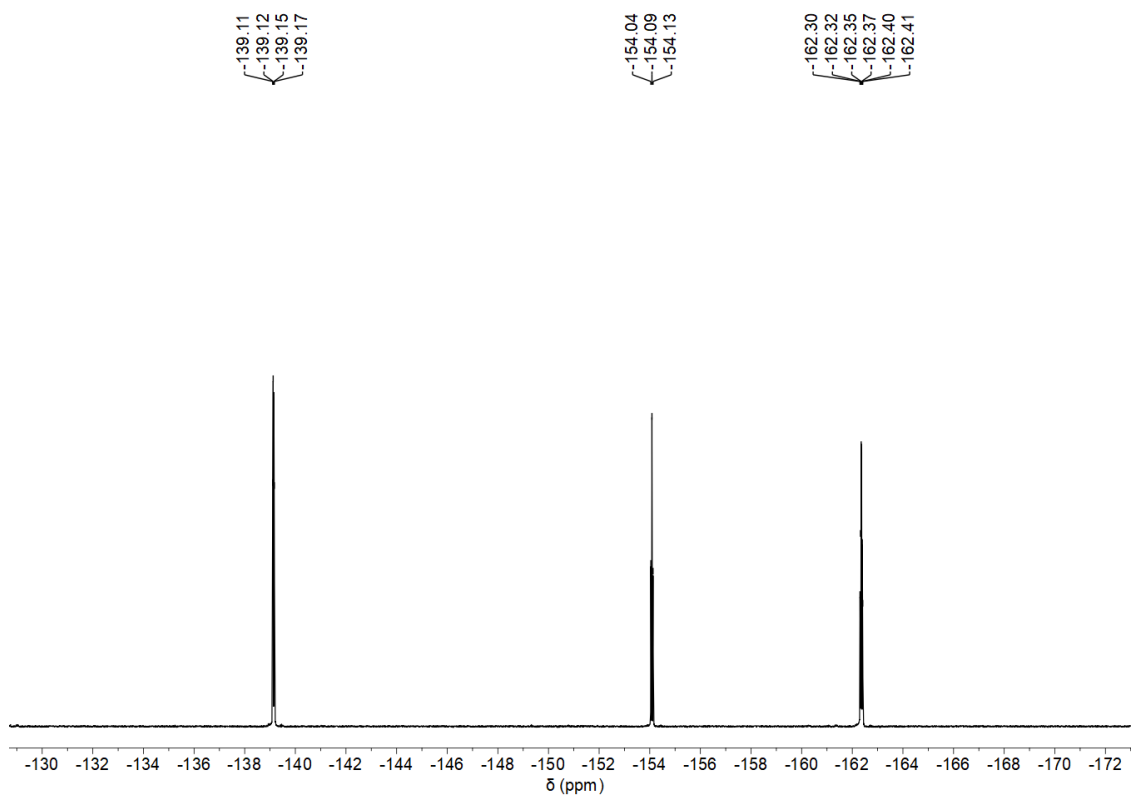

Figure S2-10.  $^{19}\text{F}\{^1\text{H}\}$  NMR spectrum of **3** in  $\text{C}_6\text{D}_6$

## Spectra of 4

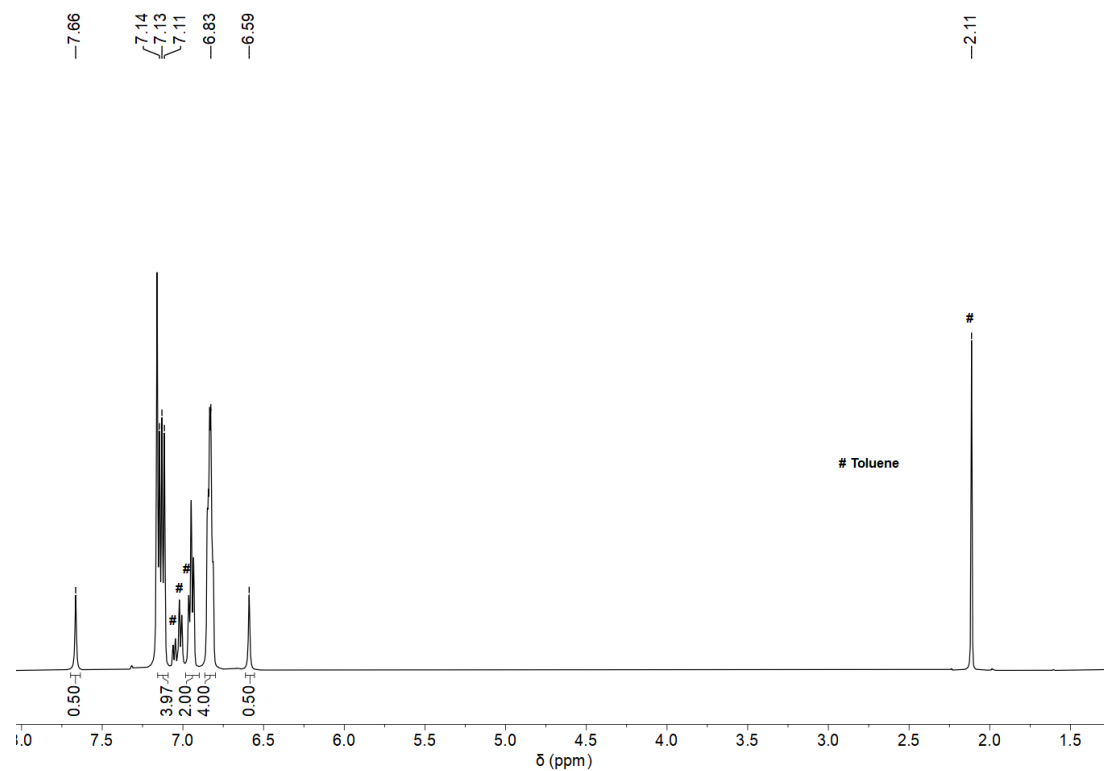

Figure S2-11  $^1\text{H}$  NMR spectrum of 4 in  $\text{C}_6\text{D}_6$  (# = Toluene)

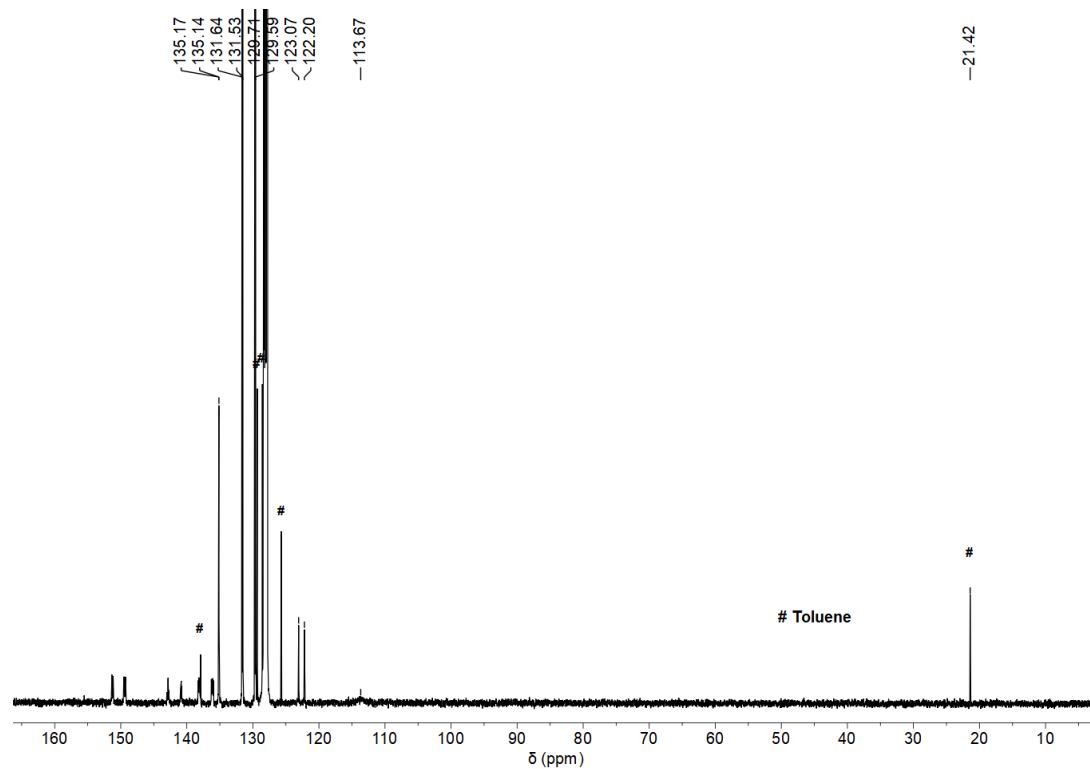

Figure S2-12  $^{13}\text{C}\{^1\text{H}\}$  NMR spectrum of 4 in  $\text{C}_6\text{D}_6$  (# = Toluene)

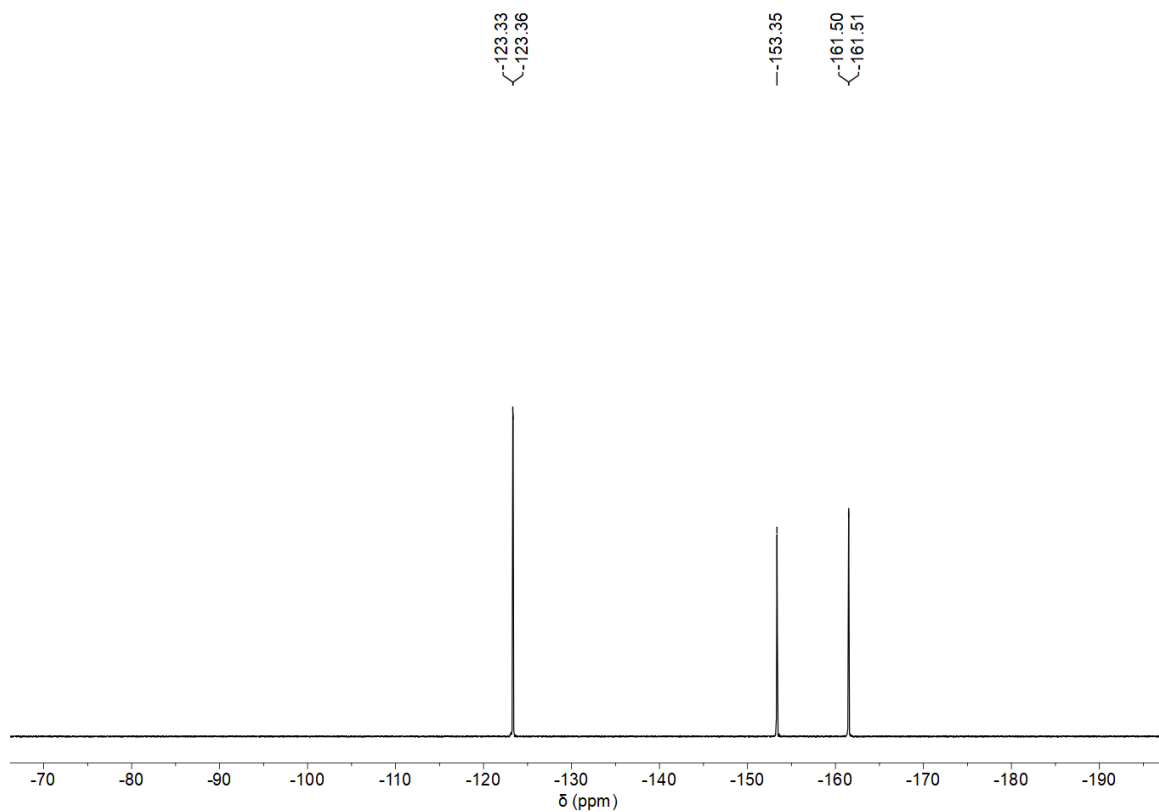

Figure S2-13  $^{19}\text{F}$   $\{^1\text{H}\}$  NMR spectrum of **4** in  $\text{C}_6\text{D}_6$

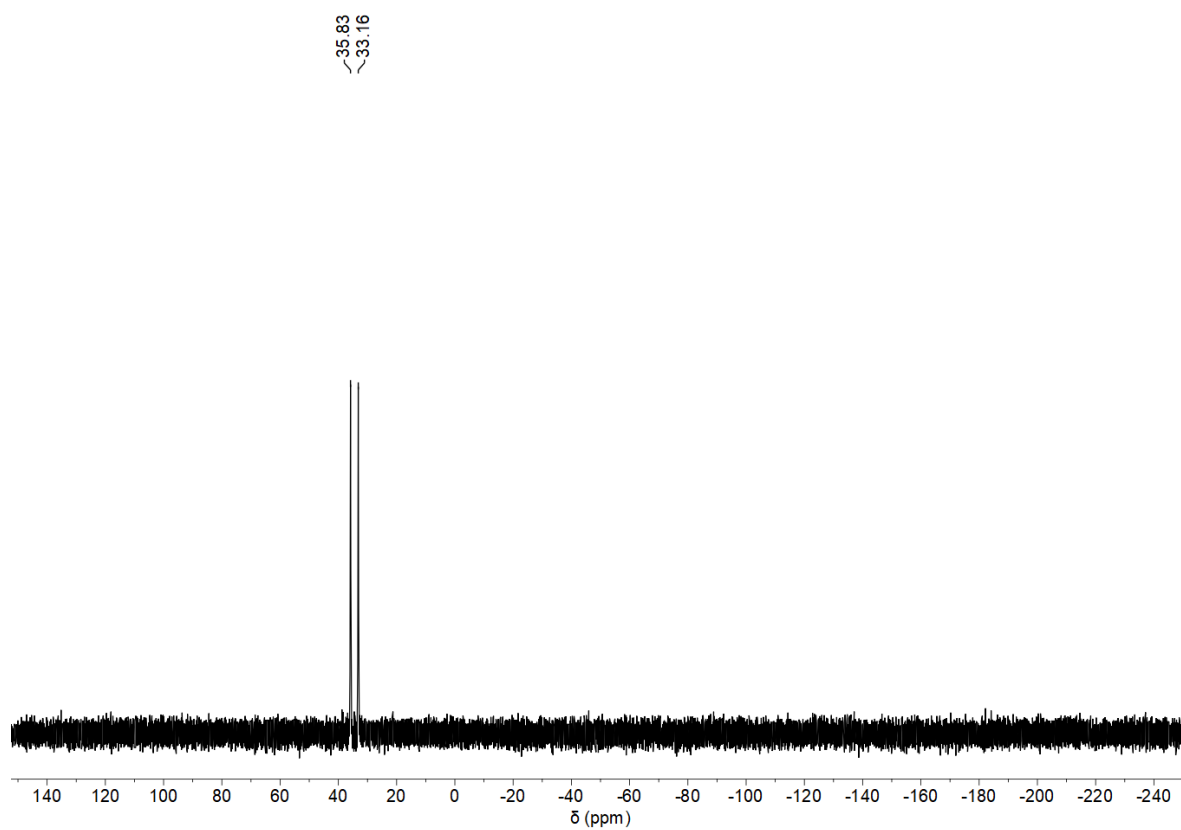

Figure S2-14  $^{31}\text{P}$  NMR spectrum of **4** in  $\text{C}_6\text{D}_6$

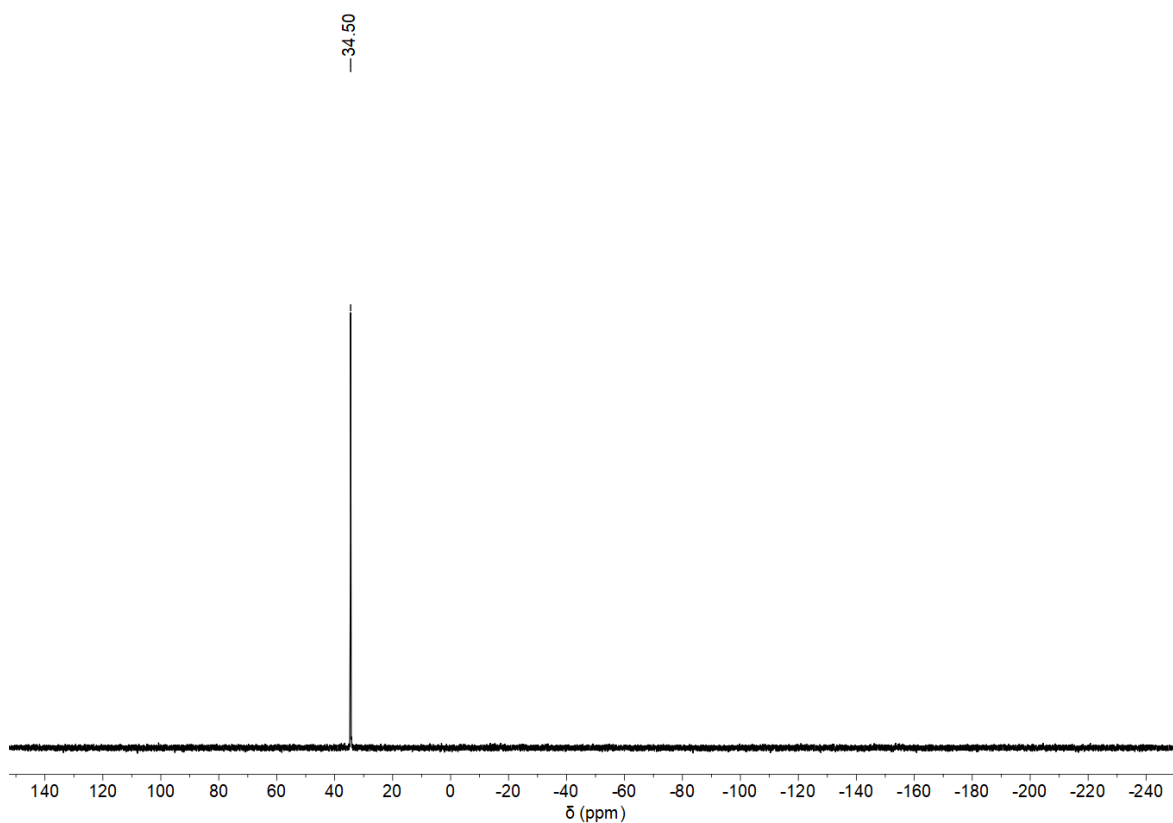

Figure S2-15  $^{31}\text{P}\{^1\text{H}\}$  NMR spectrum of **4** in  $\text{C}_6\text{D}_6$

### Spectra of **5**

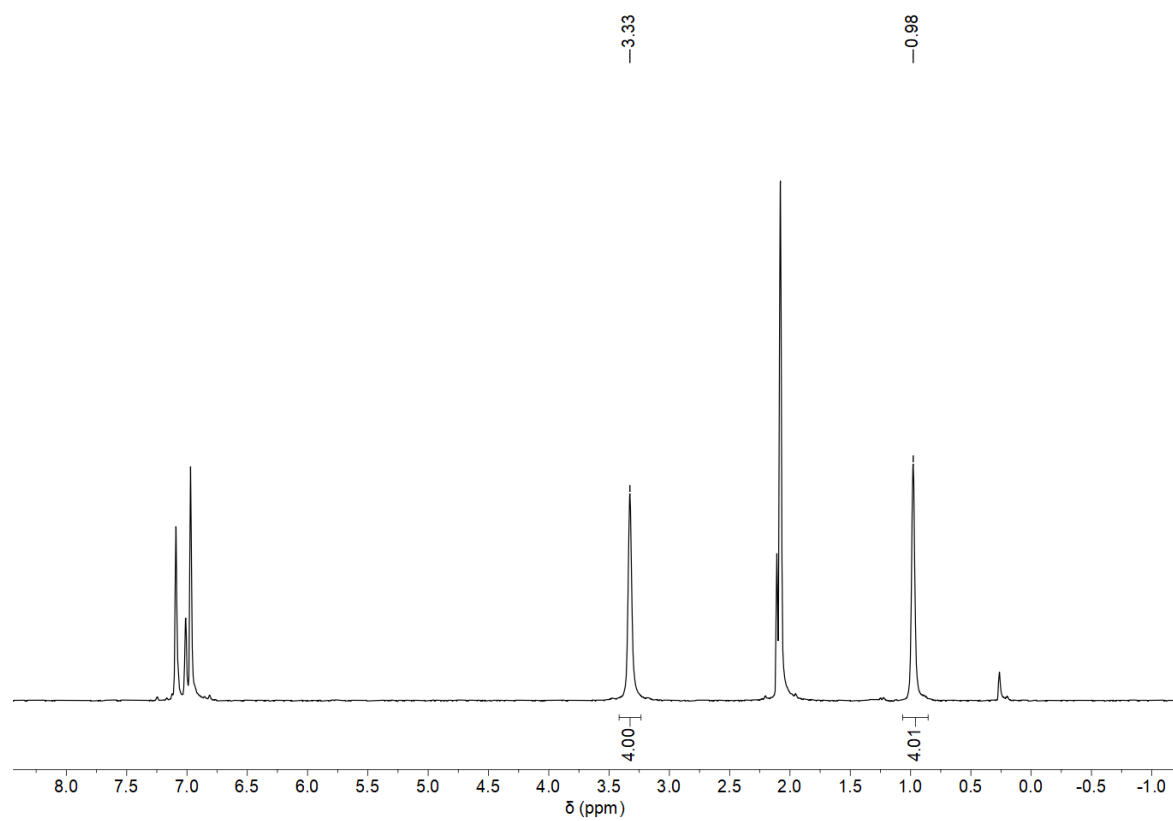

Figure S2-16  $^1\text{H}$  NMR spectrum of **5** in  $\text{Toluene-d}_8$

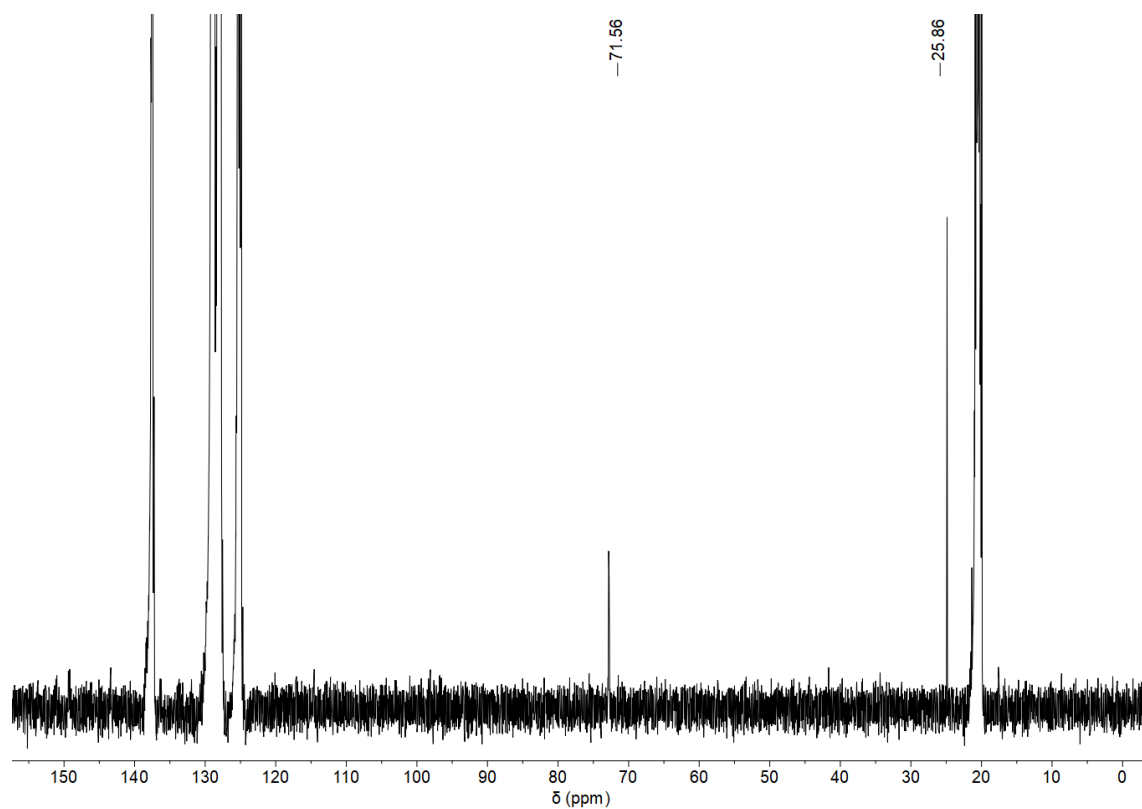

Figure S2-17  $^{13}\text{C}\{^1\text{H}\}$  NMR spectrum of **5** in Toluene- $d_8$

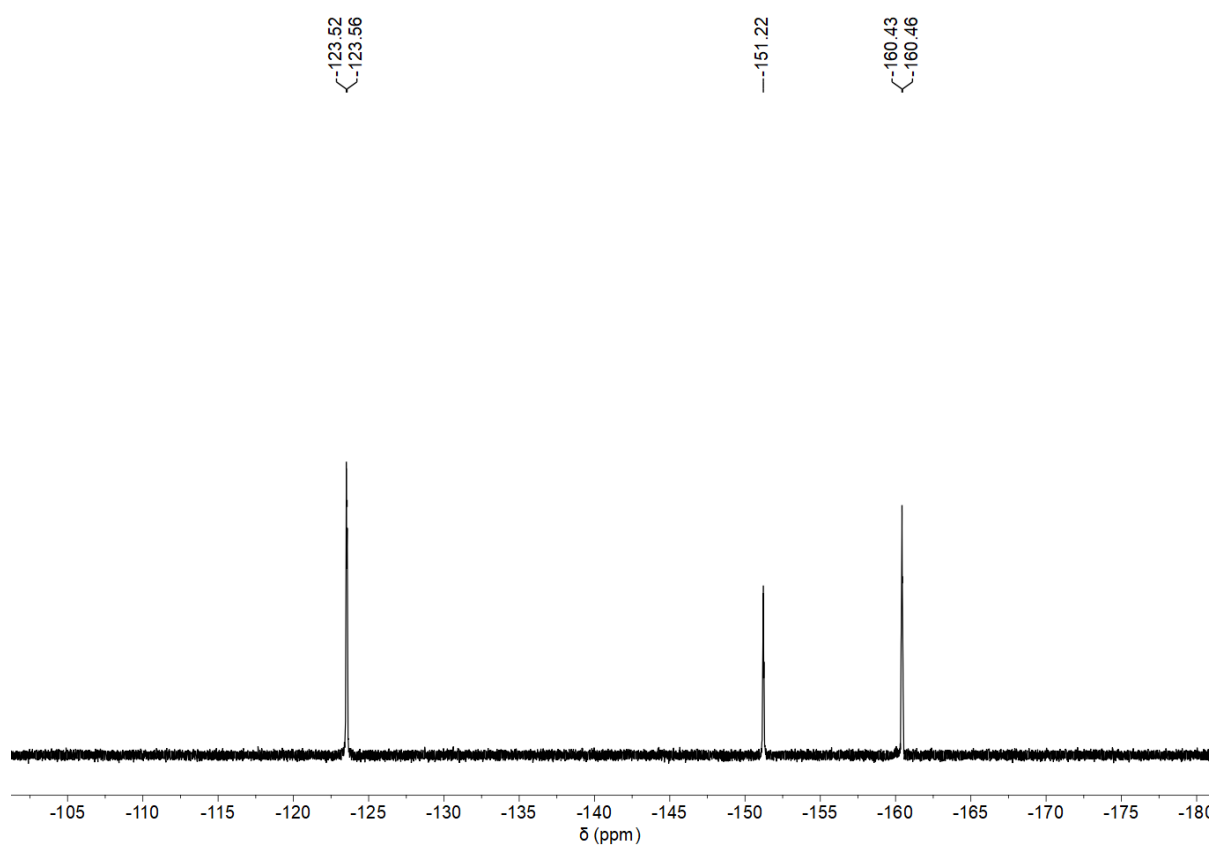

Figure S2-18  $^{19}\text{F}\{^1\text{H}\}$  NMR spectrum of **5** in Toluene- $d_8$



## Spectra of 6

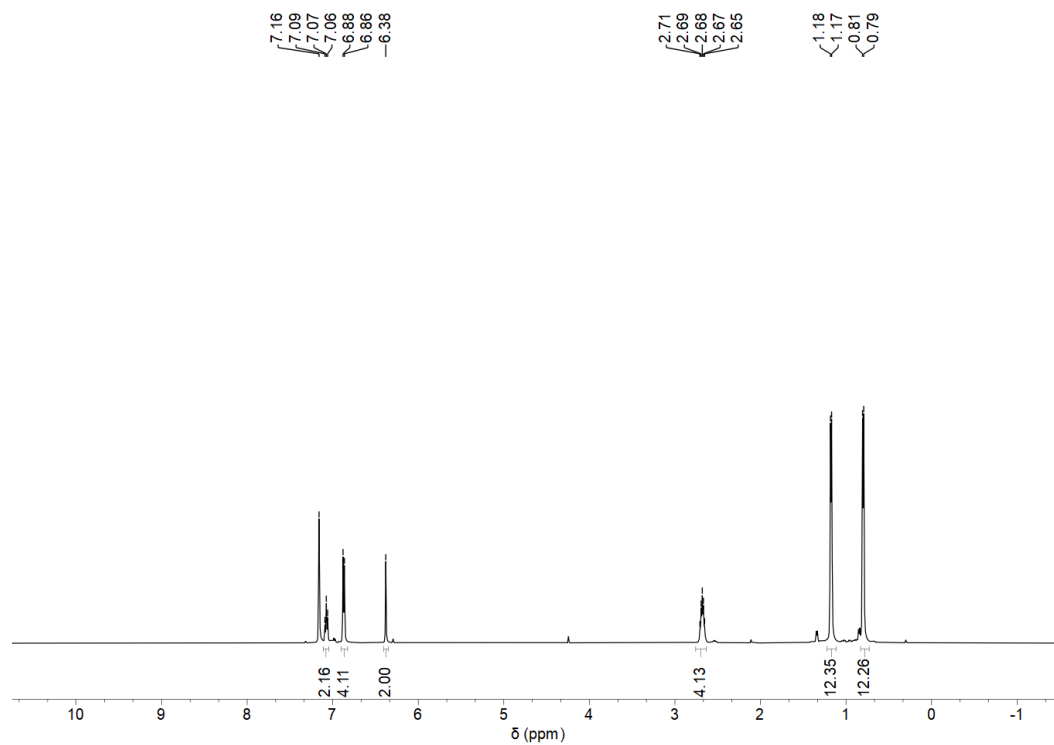

Figure S2-19  $^1\text{H}$  NMR spectrum of **6** in  $\text{C}_6\text{D}_6$

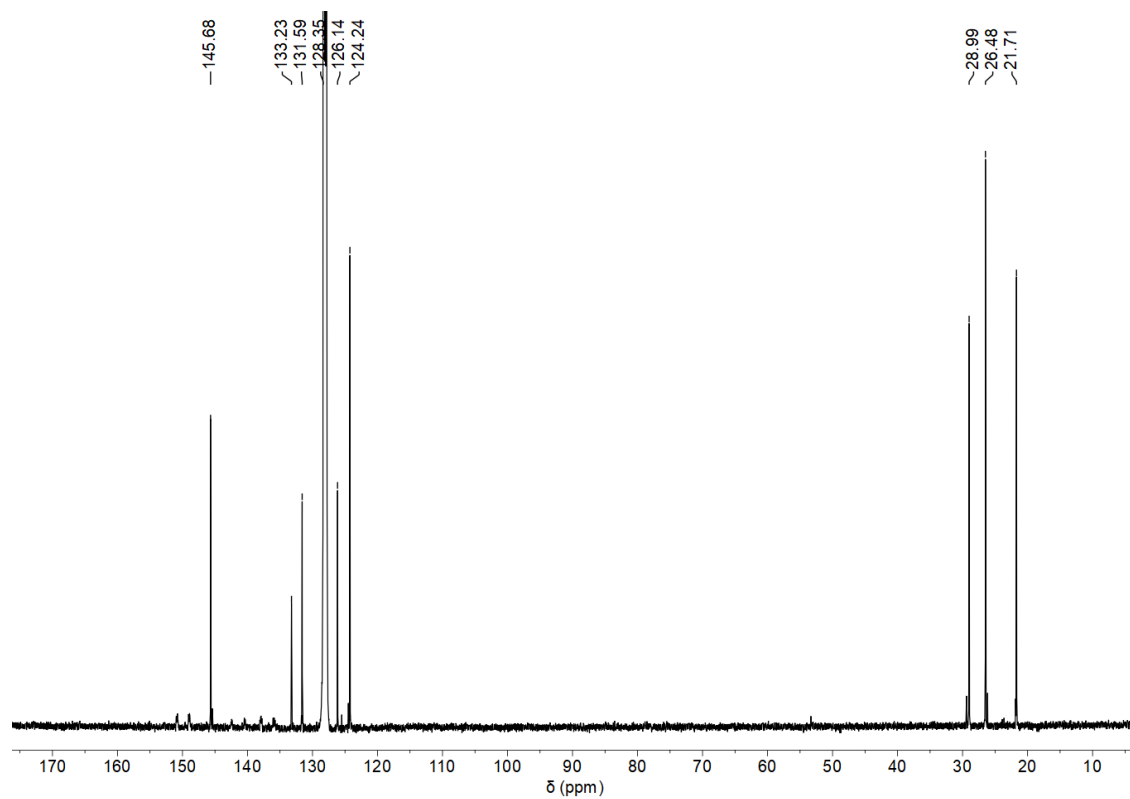

Figure S2-20  $^{13}\text{C}\{^1\text{H}\}$  NMR spectrum of **6** in  $\text{C}_6\text{D}_6$

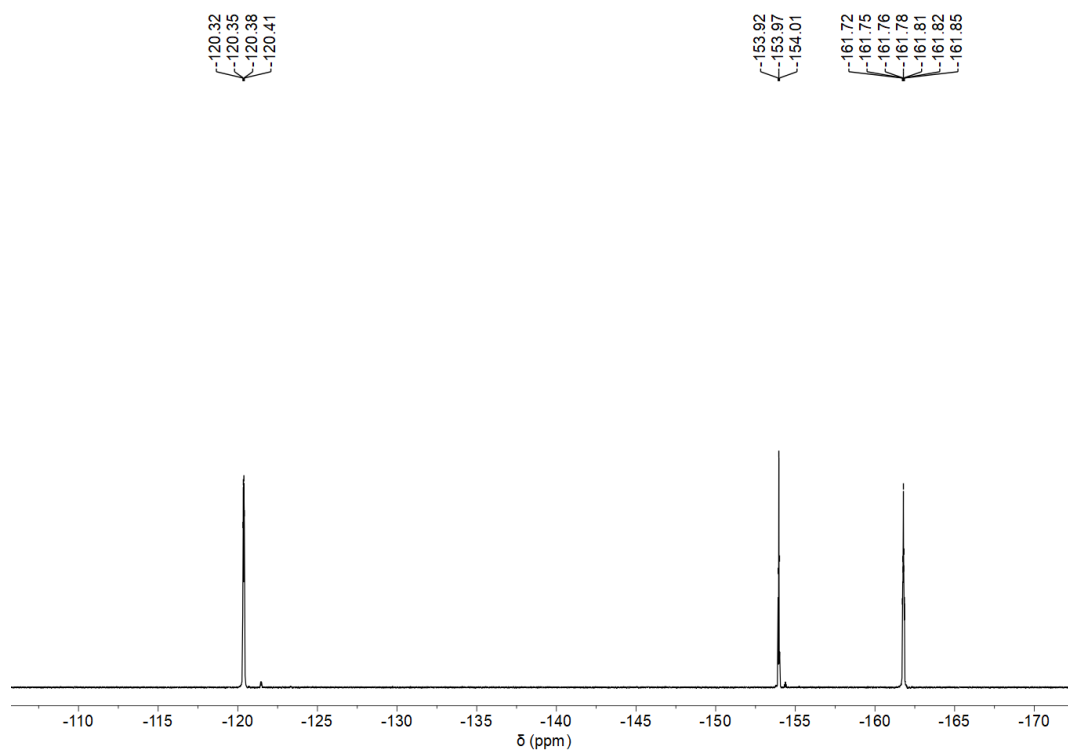

Figure S2-21  $^{19}\text{F}\{^1\text{H}\}$  NMR spectrum of **6** in  $\text{C}_6\text{D}_6$

### Spectra of **7**

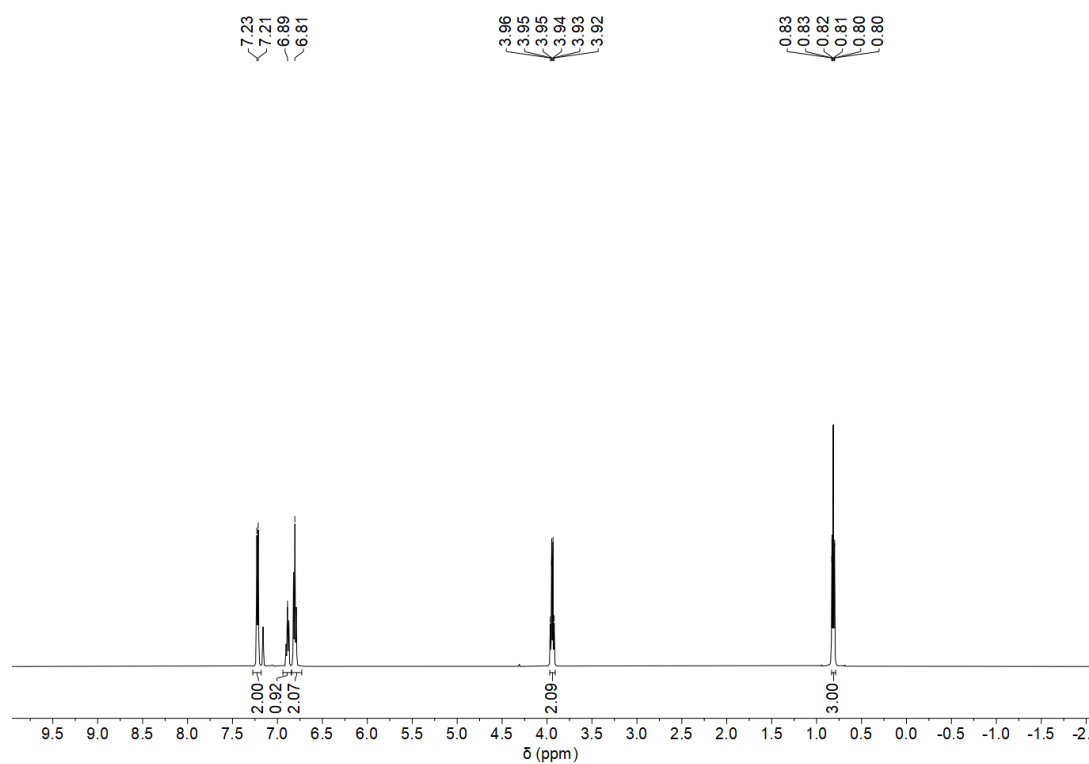

Figure S2-22  $^1\text{H}$  NMR spectrum of **7** in  $\text{C}_6\text{D}_6$

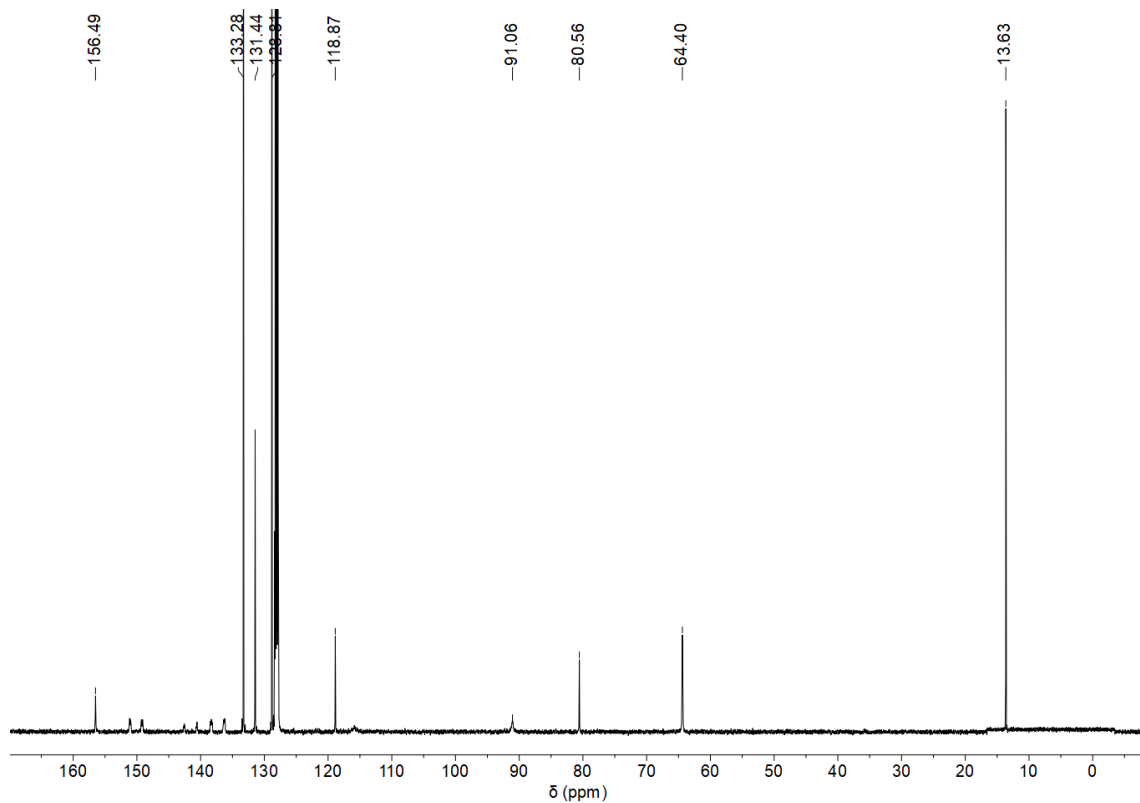

Figure S2-23  $^{13}\text{C}\{^1\text{H}\}$  NMR spectrum of **7** in  $\text{C}_6\text{D}_6$

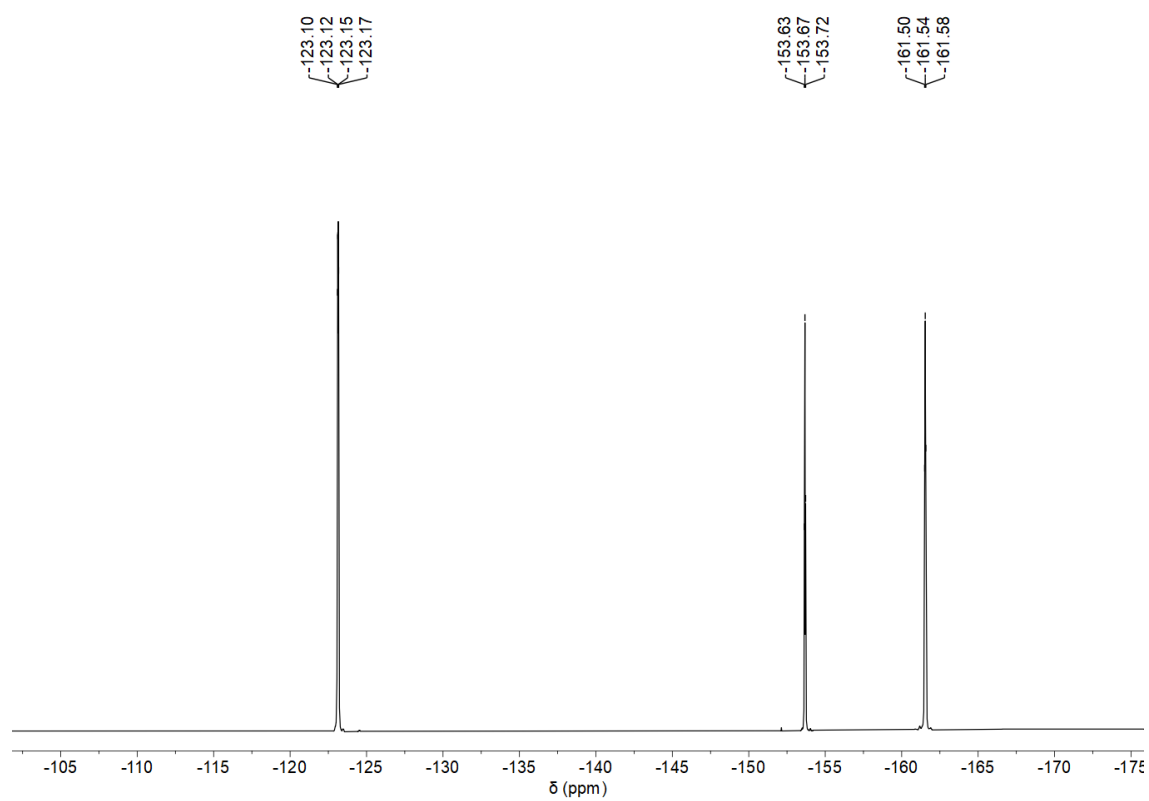

Figure S2-24  $^{19}\text{F}\{^1\text{H}\}$  NMR spectrum of **7** in  $\text{C}_6\text{D}_6$

## Spectra of **8**

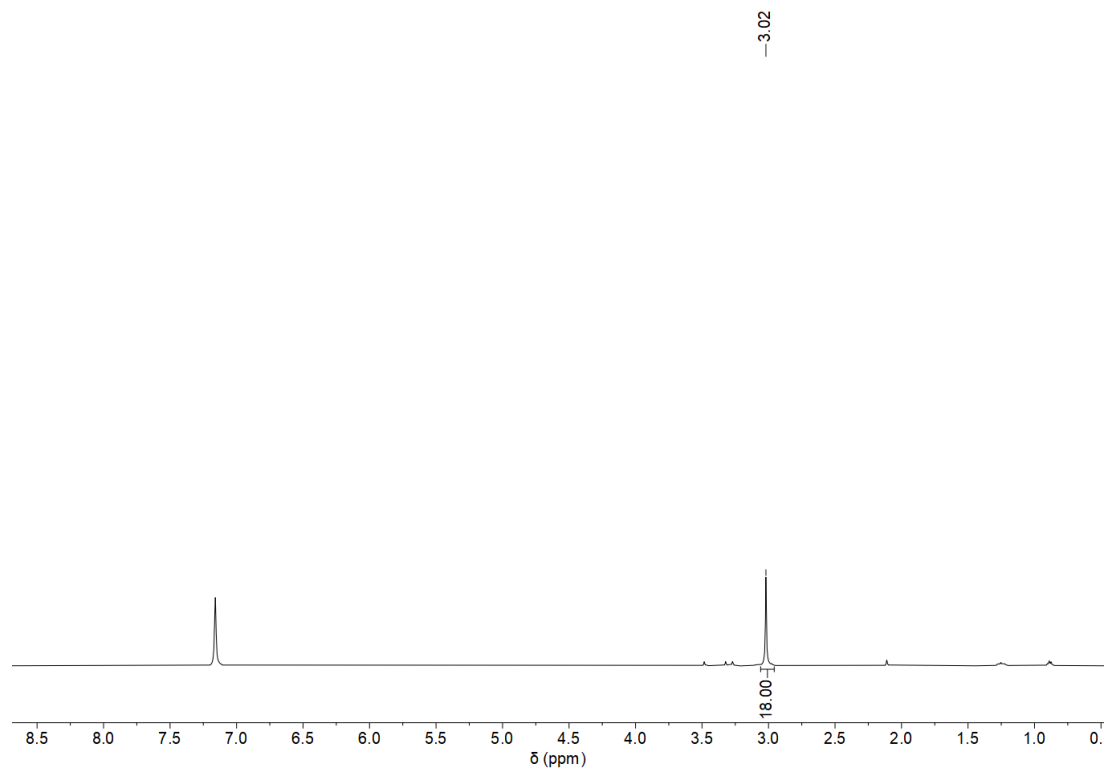

Figure S2-25  $^1\text{H}$  NMR spectrum of **8** in  $\text{C}_6\text{D}_6$ .

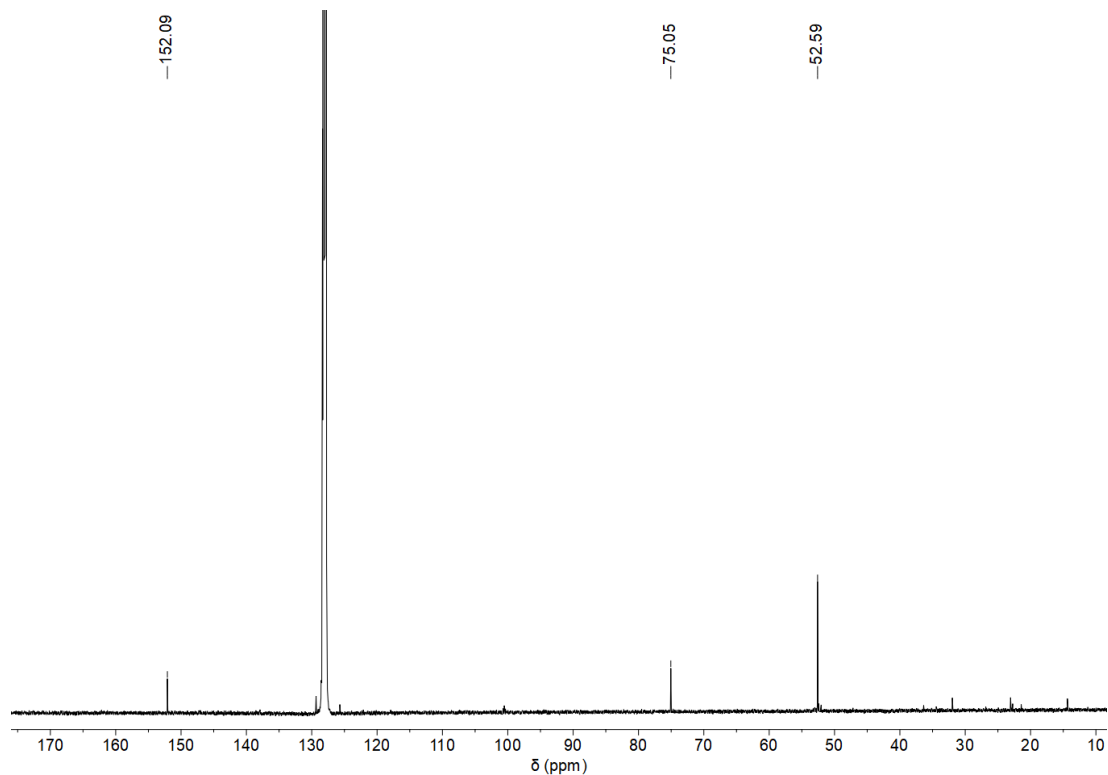

Figure S2-26  $^{13}\text{C}\{^1\text{H}\}$  NMR spectrum of **8** in  $\text{C}_6\text{D}_6$ .

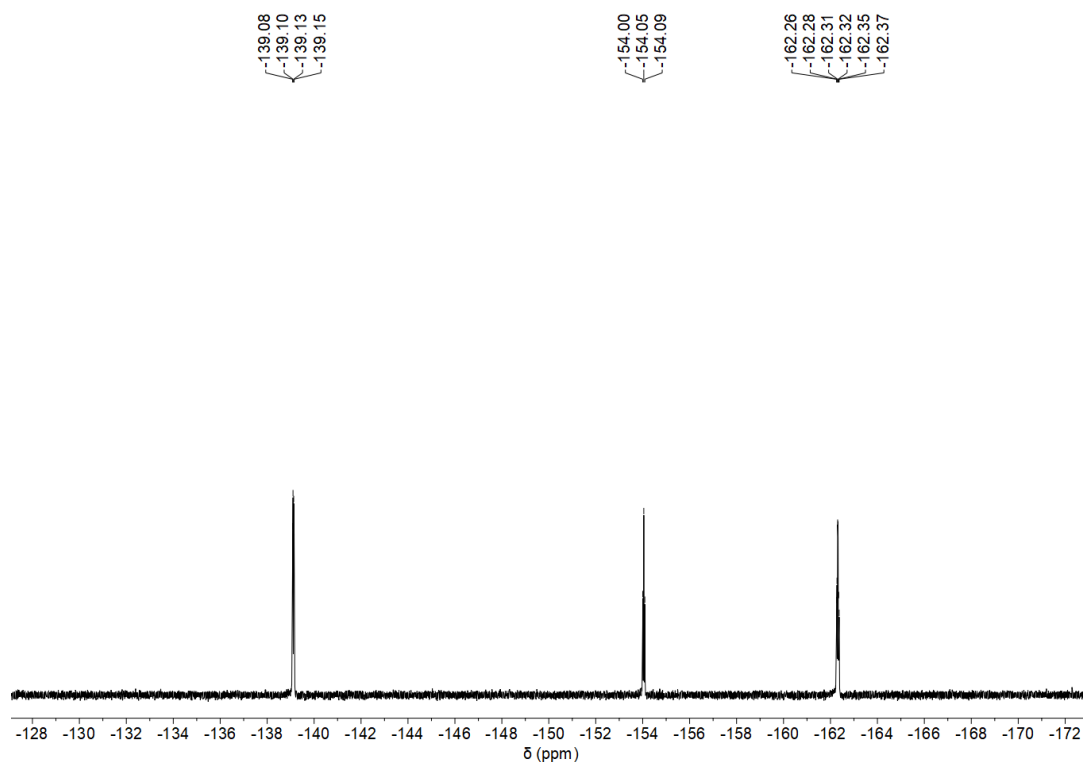

Figure S2-27  $^{19}\text{F}\{^1\text{H}\}$  NMR spectrum of **8** in  $\text{C}_6\text{D}_6$

### Spectra of **9**

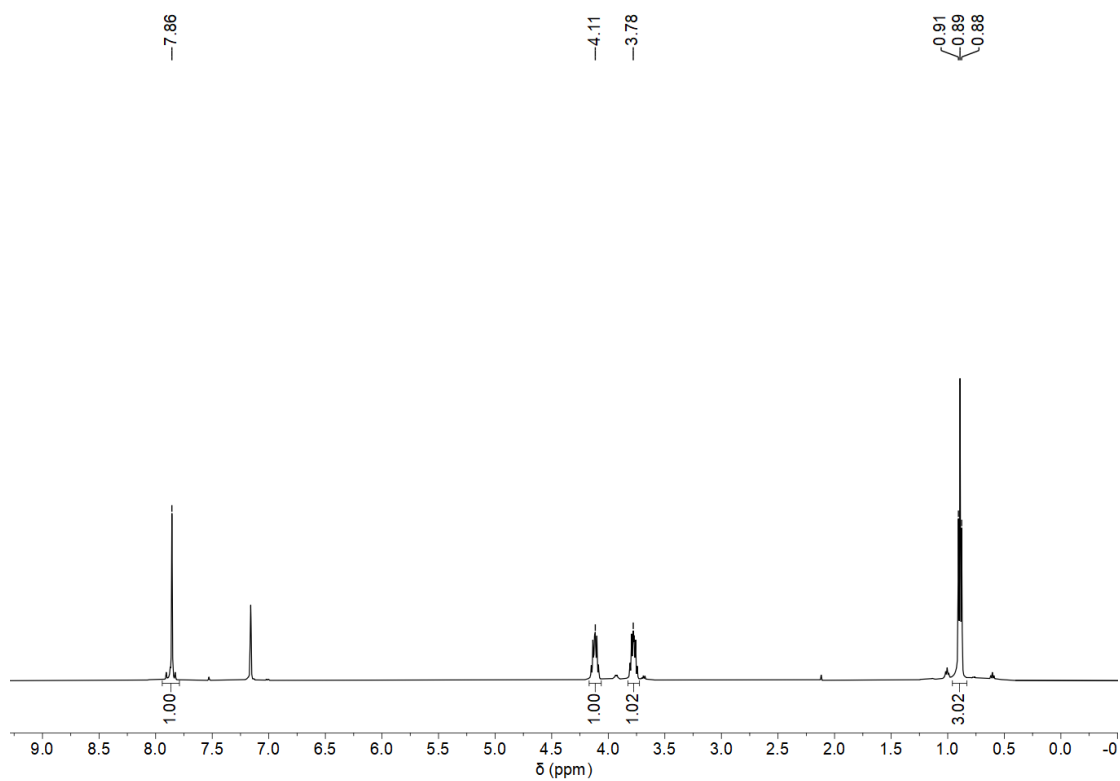

Figure S2-28  $^1\text{H}$  NMR spectrum of **9** in  $\text{C}_6\text{D}_6$

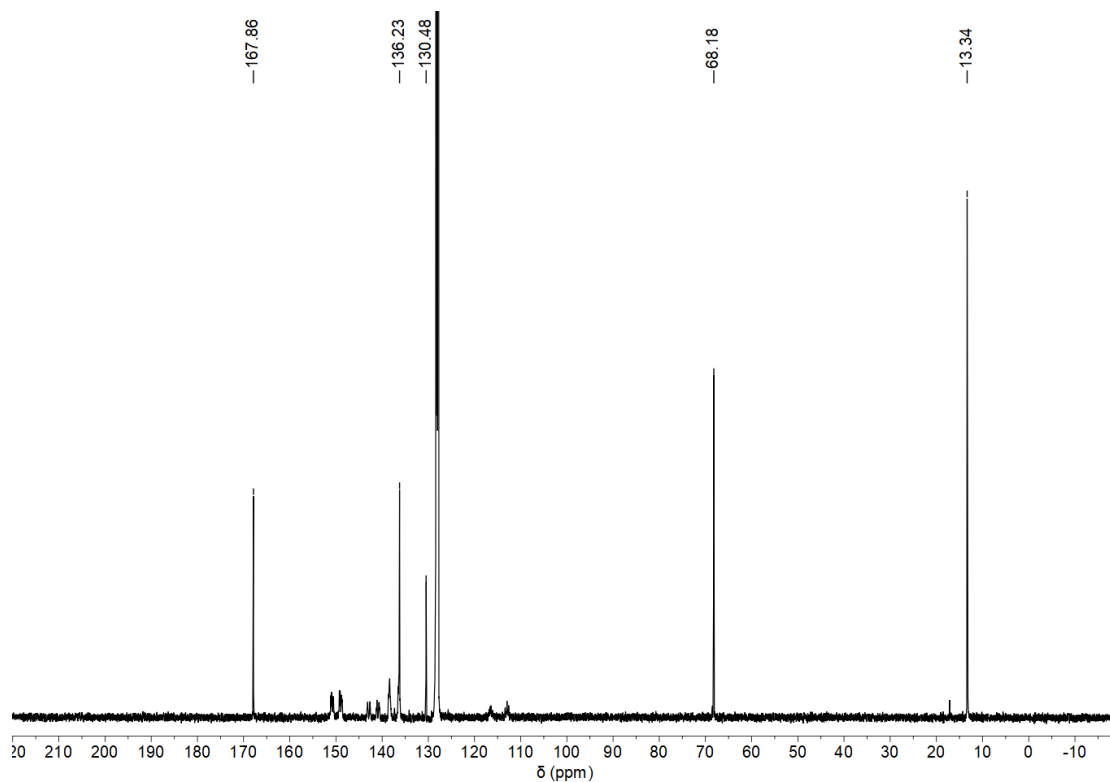

Figure S2-29  $^{13}\text{C}\{^1\text{H}\}$  NMR spectrum of **9** in  $\text{C}_6\text{D}_6$

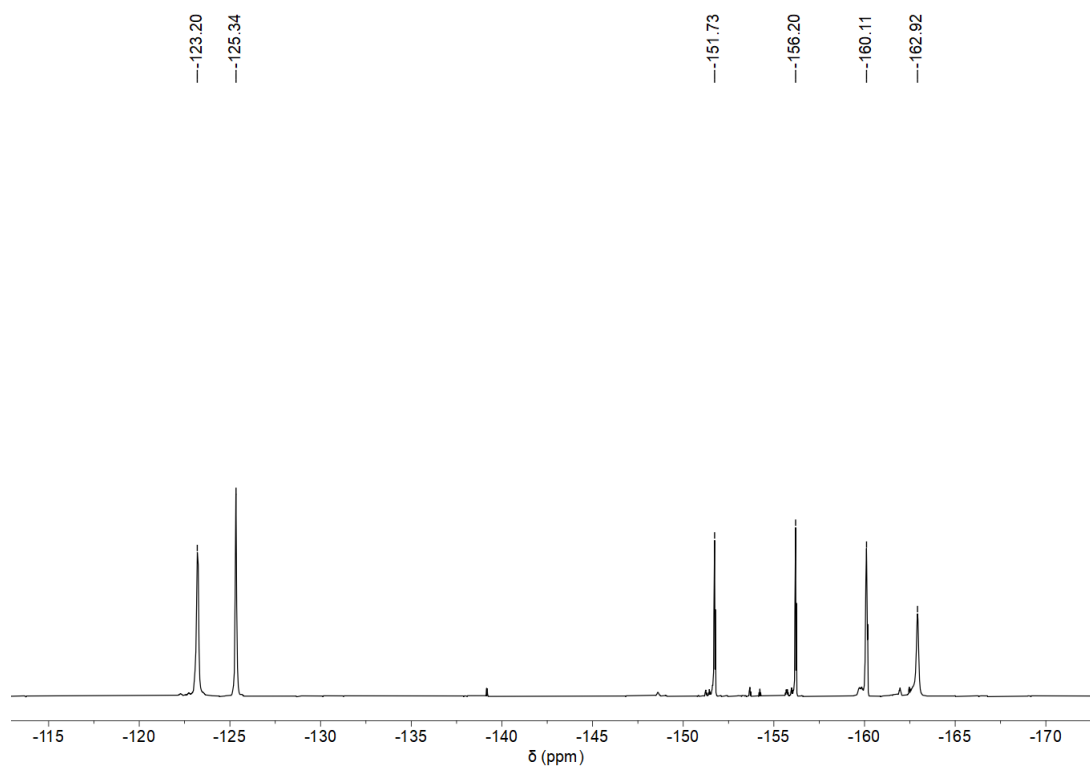

Figure S2-30  $^{19}\text{F}\{^1\text{H}\}$  NMR spectrum of **9** in  $\text{C}_6\text{D}_6$

## X-ray Crystallographic Data

Table S3-1. Crystal data and structure refinement details for compounds **1**, **2** and **3**.

| Compounds                                     | 1                                                                  | 2                                                                             | 3                                                                |
|-----------------------------------------------|--------------------------------------------------------------------|-------------------------------------------------------------------------------|------------------------------------------------------------------|
| CCDC                                          | 2329988                                                            | 2164107                                                                       | 2329987                                                          |
| Empirical formula                             | C <sub>21</sub> H <sub>9</sub> AlF <sub>15</sub> N <sub>3</sub> Si | C <sub>43</sub> H <sub>8</sub> Al <sub>3</sub> F <sub>30</sub> N <sub>9</sub> | Al <sub>4</sub> C <sub>36</sub> F <sub>30</sub> N <sub>18</sub>  |
| Formula weight                                | 643.38                                                             | 1301.52                                                                       | 1362.46                                                          |
| Temperature, K                                | 157.00                                                             | 100.00                                                                        | 150.00                                                           |
| Crystal system                                | triclinic                                                          | triclinic                                                                     | monoclinic                                                       |
| Space group                                   | <i>P</i> -1                                                        | <i>P</i> -1                                                                   | <i>C</i> 2/c                                                     |
| a, Å                                          | 10.2671(4)                                                         | 10.2372(8)                                                                    | 16.9325(12)                                                      |
| b, Å                                          | 10.9361(4)                                                         | 13.6057(11)                                                                   | 15.4312(11)                                                      |
| c, Å                                          | 11.5321(5)                                                         | 19.0058(15)                                                                   | 18.9284(15)                                                      |
| α, deg                                        | 73.646(2)                                                          | 105.775(3)                                                                    | 90                                                               |
| β, deg                                        | 81.9810(10)                                                        | 93.636(4)                                                                     | 98.544(4)                                                        |
| γ, deg                                        | 83.748(2)                                                          | 97.319(4)                                                                     | 90                                                               |
| V, Å <sup>3</sup>                             | 1227.00(9)                                                         | 2513.4(3)                                                                     | 4890.9(6)                                                        |
| Z                                             | 2                                                                  | 2                                                                             | 4                                                                |
| <i>D</i> <sub>calcd</sub> , g/cm <sup>3</sup> | 1.741                                                              | 1.720                                                                         | 1.850                                                            |
| μ/mm <sup>-1</sup>                            | 2.457                                                              | 2.151                                                                         | 2.467                                                            |
| F(000)                                        | 636.0                                                              | 1276.0                                                                        | 2656.0                                                           |
| 2θ range, °                                   | 8.042-136.676                                                      | 4.856-142.432                                                                 | 7.79-149.466                                                     |
| Index ranges                                  | -12 ≤ h ≤ 12<br>-13 ≤ k ≤ 13<br>-13 ≤ l ≤ 13                       | -12 ≤ h ≤ 12<br>-16 ≤ k ≤ 16<br>-23 ≤ l ≤ 23                                  | -21 ≤ h ≤ 21<br>-17 ≤ k ≤ 19<br>-23 ≤ l ≤ 21                     |
| Reflections collected                         | 38117                                                              | 89652                                                                         | 32773                                                            |
| Independent reflections                       | 4490<br>R <sub>int</sub> = 0.0494<br>R <sub>sigma</sub> = 0.0262   | 9605<br>R <sub>int</sub> = 0.0842<br>R <sub>sigma</sub> = 0.0407              | 4980<br>R <sub>int</sub> = 0.0583<br>R <sub>sigma</sub> = 0.0336 |
| Data/restraints/parameters                    | 4490/0/373                                                         | 9605/0/776                                                                    | 4980/0/398                                                       |
| Goodness-of-fit on F <sup>2</sup>             | 1.053                                                              | 1.064                                                                         | 1.071                                                            |
| Final R indexes [ <i>I</i> ≥ 2σ( <i>I</i> )]  | R <sub>1</sub> = 0.0348<br>wR <sub>2</sub> = 0.0940                | R <sub>1</sub> = 0.0582<br>wR <sub>2</sub> = 0.1674                           | R <sub>1</sub> = 0.0417<br>wR <sub>2</sub> = 0.1103              |
| Final R indexes [all data]                    | R <sub>1</sub> = 0.0356<br>wR <sub>2</sub> = 0.0947                | R <sub>1</sub> = 0.0636<br>wR <sub>2</sub> = 0.1731                           | R <sub>1</sub> = 0.0554<br>wR <sub>2</sub> = 0.1193              |
| Largest diff. peak/hole, e/Å <sup>-3</sup>    | 0.32/-0.25                                                         | 0.69/-0.28                                                                    | 0.38/-0.30                                                       |

Table S3-2. Crystal data and structure refinement details for compounds **4**, **5** and **6**.

| <b>Compounds</b>                                             | <b>4</b>                                                                                                     | <b>5</b>                                                                                      | <b>6</b>                                                                       |
|--------------------------------------------------------------|--------------------------------------------------------------------------------------------------------------|-----------------------------------------------------------------------------------------------|--------------------------------------------------------------------------------|
| CCDC                                                         | 2329992                                                                                                      | 2329990                                                                                       | 2329991                                                                        |
| Empirical formula                                            | C <sub>48</sub> H <sub>22</sub> Al <sub>2</sub> F <sub>20</sub> N <sub>6</sub> O <sub>2</sub> P <sub>2</sub> | C <sub>32</sub> H <sub>16</sub> Al <sub>2</sub> F <sub>20</sub> N <sub>6</sub> O <sub>2</sub> | C <sub>39</sub> H <sub>36</sub> AlF <sub>10</sub> N <sub>5</sub>               |
| Formula weight                                               | 1210.61                                                                                                      | 950.47                                                                                        | 791.71                                                                         |
| Temperature, K                                               | 300.00                                                                                                       | 150.00                                                                                        | 150.00                                                                         |
| Crystal system                                               | monoclinic                                                                                                   | triclinic                                                                                     | monoclinic                                                                     |
| Space group                                                  | <i>P</i> 2 <sub>1</sub> / <i>c</i>                                                                           | <i>P</i> -1                                                                                   | <i>P</i> 2 <sub>1</sub> / <i>n</i>                                             |
| <i>a</i> , Å                                                 | 10.9682(6)                                                                                                   | 9.2131(3)                                                                                     | 19.2920(6)                                                                     |
| <i>b</i> , Å                                                 | 17.7358(10)                                                                                                  | 10.4091(3)                                                                                    | 9.3783(3)                                                                      |
| <i>c</i> , Å                                                 | 14.8935(9)                                                                                                   | 11.8882(4)                                                                                    | 22.1910(6)                                                                     |
| $\alpha$ , deg                                               | 90                                                                                                           | 67.1200(1)                                                                                    | 90                                                                             |
| $\beta$ , deg                                                | 107.531(4)                                                                                                   | 84.917(2)                                                                                     | 108.446(2)                                                                     |
| $\gamma$ , deg                                               | 90                                                                                                           | 82.702(2)                                                                                     | 90                                                                             |
| <i>V</i> , Å <sup>3</sup>                                    | 2762.7(3)                                                                                                    | 1040.91(6)                                                                                    | 3808.7(2)                                                                      |
| <i>Z</i>                                                     | 2                                                                                                            | 1                                                                                             | 4                                                                              |
| <i>D</i> <sub>calcd</sub> , g/cm <sup>3</sup>                | 1.455                                                                                                        | 1.516                                                                                         | 1.381                                                                          |
| $\mu$ /mm <sup>-1</sup>                                      | 2.037                                                                                                        | 1.819                                                                                         | 1.218                                                                          |
| F(000)                                                       | 1208.0                                                                                                       | 472.0                                                                                         | 1632.0                                                                         |
| 2 $\theta$ range, °                                          | 8.454-133.89                                                                                                 | 9.268-136.658                                                                                 | 5.302-133.174                                                                  |
| Index ranges                                                 | -13 ≤ <i>h</i> ≤ 13<br>-21 ≤ <i>k</i> ≤ 21<br>-17 ≤ <i>l</i> ≤ 17                                            | -11 ≤ <i>h</i> ≤ 10<br>-12 ≤ <i>k</i> ≤ 12<br>-14 ≤ <i>l</i> ≤ 14                             | -22 ≤ <i>h</i> ≤ 22<br>-11 ≤ <i>k</i> ≤ 11<br>-26 ≤ <i>l</i> ≤ 26              |
| Reflections collected                                        | 47777                                                                                                        | 17341                                                                                         | 69159                                                                          |
| Independent reflections                                      | 4894<br><i>R</i> <sub>int</sub> = 0.0997<br><i>R</i> <sub>sigma</sub> = 0.0435                               | 3770<br><i>R</i> <sub>int</sub> = 0.0403<br><i>R</i> <sub>sigma</sub> = 0.0276                | 6671<br><i>R</i> <sub>int</sub> = 0.0626<br><i>R</i> <sub>sigma</sub> = 0.0273 |
| Data/restraints/parameters                                   | 4894/0/365                                                                                                   | 3770/5/290                                                                                    | 6671/18/534                                                                    |
| Goodness-of-fit on F <sup>2</sup>                            | 1.027                                                                                                        | 1.170                                                                                         | 1.042                                                                          |
| Final <i>R</i> indexes [ <i>I</i> ≥ 2 $\sigma$ ( <i>I</i> )] | <i>R</i> <sub>1</sub> = 0.0434<br><i>wR</i> <sub>2</sub> = 0.1090                                            | <i>R</i> <sub>1</sub> = 0.0461<br><i>wR</i> <sub>2</sub> = 0.1642                             | <i>R</i> <sub>1</sub> = 0.0381<br><i>wR</i> <sub>2</sub> = 0.0963              |
| Final <i>R</i> indexes [all data]                            | <i>R</i> <sub>1</sub> = 0.0656<br><i>wR</i> <sub>2</sub> = 0.1214                                            | <i>R</i> <sub>1</sub> = 0.0491<br><i>wR</i> <sub>2</sub> = 0.1672                             | <i>R</i> <sub>1</sub> = 0.0443<br><i>wR</i> <sub>2</sub> = 0.1005              |
| Largest diff. peak/hole, e/Å <sup>-3</sup>                   | 0.15/-0.24                                                                                                   | 0.33/-0.32                                                                                    | 0.28/-0.25                                                                     |



Table S3-3. Crystal data and structure refinement details for compounds **7**, **8** and **9**

|                                               | <b>7</b> ·C <sub>6</sub> H <sub>6</sub>                                                       | <b>8</b>                                                                                       | <b>9</b> (monomer)                                                             |
|-----------------------------------------------|-----------------------------------------------------------------------------------------------|------------------------------------------------------------------------------------------------|--------------------------------------------------------------------------------|
| CCDC                                          | 2356544                                                                                       | 2329989                                                                                        | 2359713                                                                        |
| Empirical formula                             | C <sub>52</sub> H <sub>26</sub> Al <sub>2</sub> F <sub>20</sub> N <sub>6</sub> O <sub>4</sub> | C <sub>66</sub> H <sub>28</sub> Al <sub>3</sub> F <sub>32</sub> N <sub>9</sub> O <sub>12</sub> | C <sub>17</sub> H <sub>6</sub> AlF <sub>10</sub> N <sub>3</sub> O <sub>2</sub> |
| Formula weight                                | 1232.75                                                                                       | 1827.91                                                                                        | 501.23                                                                         |
| Temperature, K                                | 150.00                                                                                        | 150.00                                                                                         | 150.00                                                                         |
| Crystal system                                | triclinic                                                                                     | orthorhombic                                                                                   | tetragonal                                                                     |
| Space group                                   | <i>P</i> -1                                                                                   | <i>Pcca</i>                                                                                    | <i>P4/ncc</i>                                                                  |
| a, Å                                          | 9.6882(2)                                                                                     | 18.8878(6)                                                                                     | 21.4449(5)                                                                     |
| b, Å                                          | 11.7436(3)                                                                                    | 20.7586(7)                                                                                     | 21.4449(5)                                                                     |
| c, Å                                          | 12.2421(3)                                                                                    | 19.2371(6)                                                                                     | 20.4556(8)                                                                     |
| α, deg                                        | 70.2630(10)                                                                                   | 90                                                                                             | 90                                                                             |
| β, deg                                        | 81.3600(10)                                                                                   | 90                                                                                             | 90                                                                             |
| γ, deg                                        | 76.2790(10)                                                                                   | 90                                                                                             | 90                                                                             |
| V, Å <sup>3</sup>                             | 1269.85(5)                                                                                    | 7542.6(4)                                                                                      | 9407.2(6)                                                                      |
| Z                                             | 1                                                                                             | 4                                                                                              | 16                                                                             |
| <i>D</i> <sub>calcd</sub> , g/cm <sup>3</sup> | 1.612                                                                                         | 1.610                                                                                          | 1.416                                                                          |
| μ/mm <sup>-1</sup>                            | 1.681                                                                                         | 1.790                                                                                          | 1.677                                                                          |
| F(000)                                        | 618.0                                                                                         | 3640.0                                                                                         | 3968.0                                                                         |
| 2θ range, °                                   | 8.164 - 136.664                                                                               | 4.256-136.92                                                                                   | 8.12 - 133.18                                                                  |
| Index ranges                                  | -11 ≤ h ≤ 11<br>-14 ≤ k ≤ 14<br>-14 ≤ l ≤ 14                                                  | -22 ≤ h ≤ 19<br>-21 ≤ k ≤ 25<br>-17 ≤ l ≤ 23                                                   | -25 ≤ h ≤ 25<br>-23 ≤ k ≤ 20<br>-24 ≤ l ≤ 24                                   |
| Reflections collected                         | 35775                                                                                         | 48037                                                                                          | 67395                                                                          |
| Independent reflections                       | 4558<br>R <sub>int</sub> = 0.0423<br>R <sub>sigma</sub> = 0.0241                              | 6916<br>R <sub>int</sub> = 0.0905<br>R <sub>sigma</sub> = 0.0534                               | 4336<br>R <sub>int</sub> = 0.1320<br>R <sub>sigma</sub> = 0.0320               |
| Data/restraints/parameters                    | 4558/0/380                                                                                    | 6916/0/554                                                                                     | 4336/0/299                                                                     |
| Goodness-of-fit on F <sup>2</sup>             | 1.065                                                                                         | 1.027                                                                                          | 1.058                                                                          |
| Final R indexes [I ≥ 2σ (I)]                  | R <sub>1</sub> = 0.0392<br>wR <sub>2</sub> = 0.1066                                           | R <sub>1</sub> = 0.0498<br>wR <sub>2</sub> = 0.1307                                            | R <sub>1</sub> = 0.0618<br>wR <sub>2</sub> = 0.1697                            |
| Final R indexes [all data]                    | R <sub>1</sub> = 0.0403<br>wR <sub>2</sub> = 0.1074                                           | R <sub>1</sub> = 0.0724<br>wR <sub>2</sub> = 0.1446                                            | R <sub>1</sub> = 0.0817<br>wR <sub>2</sub> = 0.1928                            |
| Largest diff. peak/hole, e/Å <sup>-3</sup>    | 0.32/-0.32                                                                                    | 0.36/-0.41                                                                                     | 0.39/-0.36                                                                     |

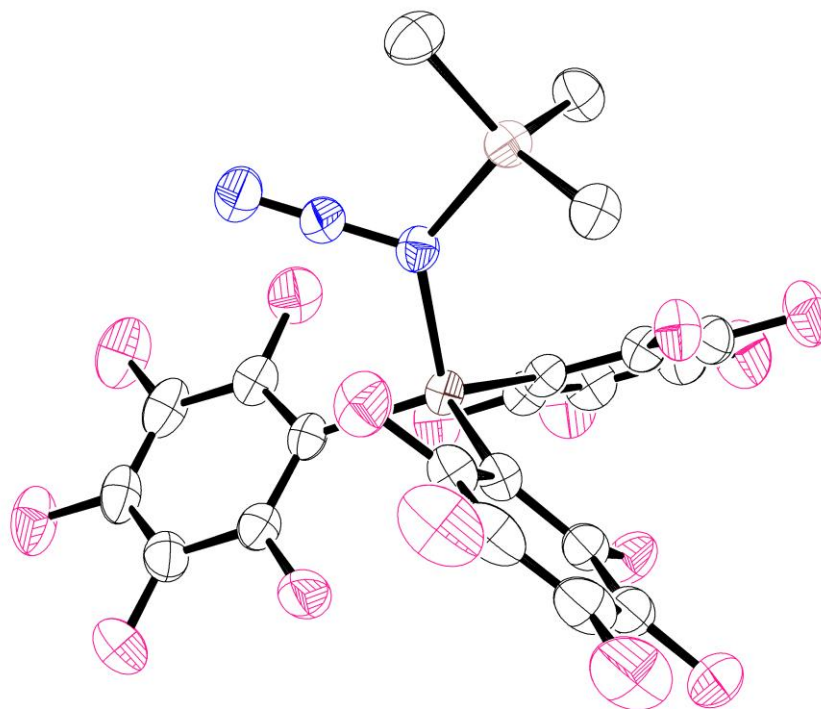

Figure S3-1. Solid-state structures of **1**. Hydrogen atoms omitted for clarity. Thermal ellipsoids are set at the 50% probability level.

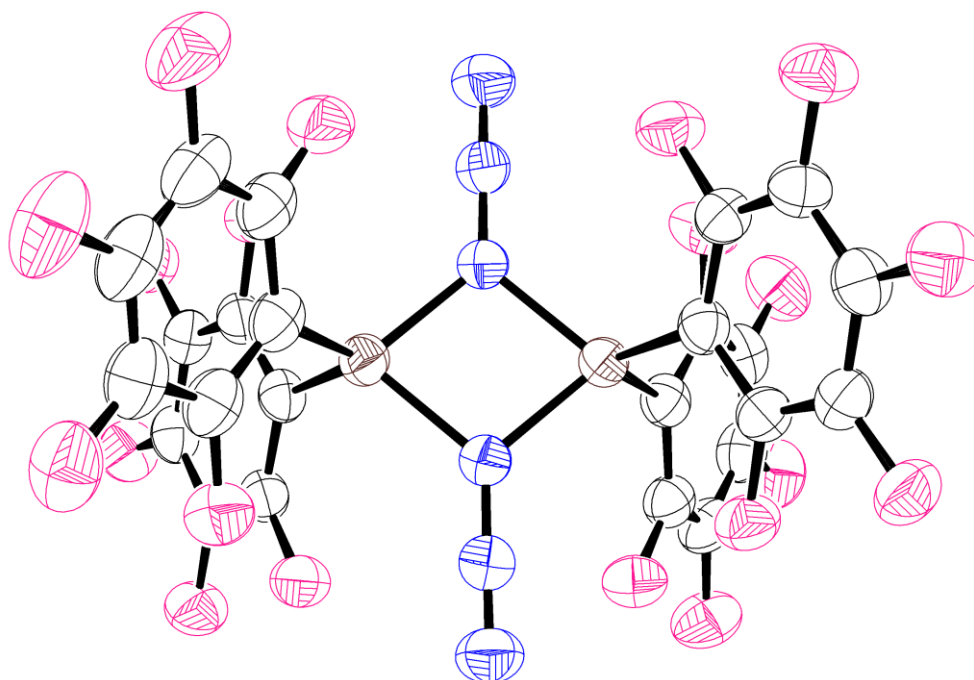

Figure S3-2. Solid-state structures of **2**. Thermal ellipsoids are set at the 50% probability level.

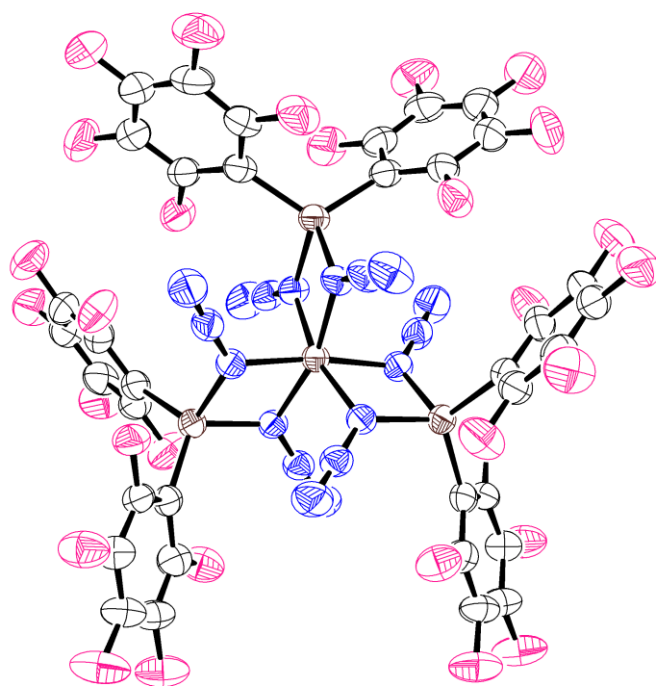

Figure S3-3. Solid-state structures of **3**. Thermal ellipsoids are set at the 50% probability level.

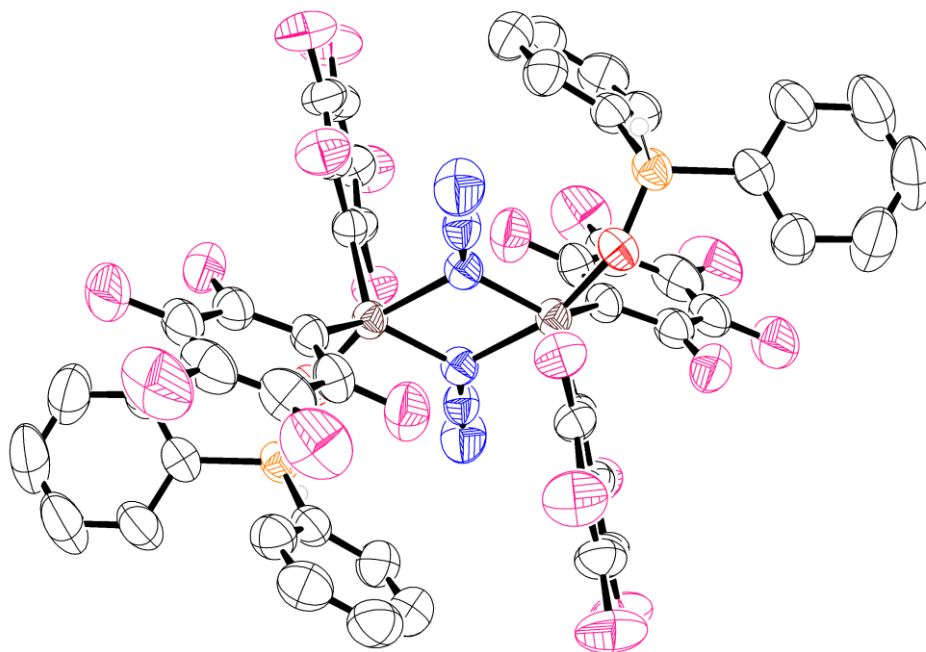

Figure S3-4. Solid-state structures of **4**. Hydrogen atoms except those on P atoms are omitted for clarity. Thermal ellipsoids are set at the 50% probability level.

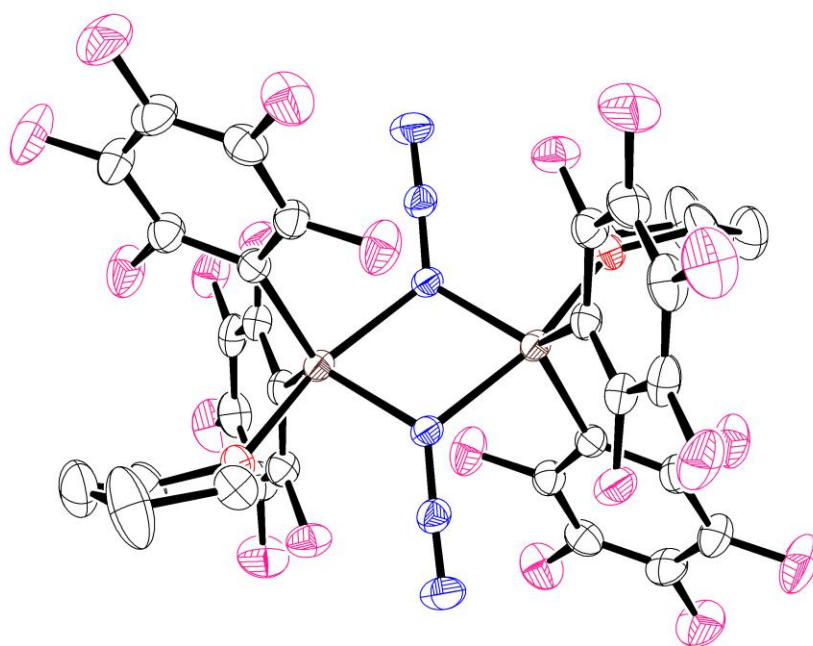

Figure S3-5. Solid-state structures of **5**. Hydrogen atoms are omitted for clarity. Thermal ellipsoids are set at the 50% probability level.

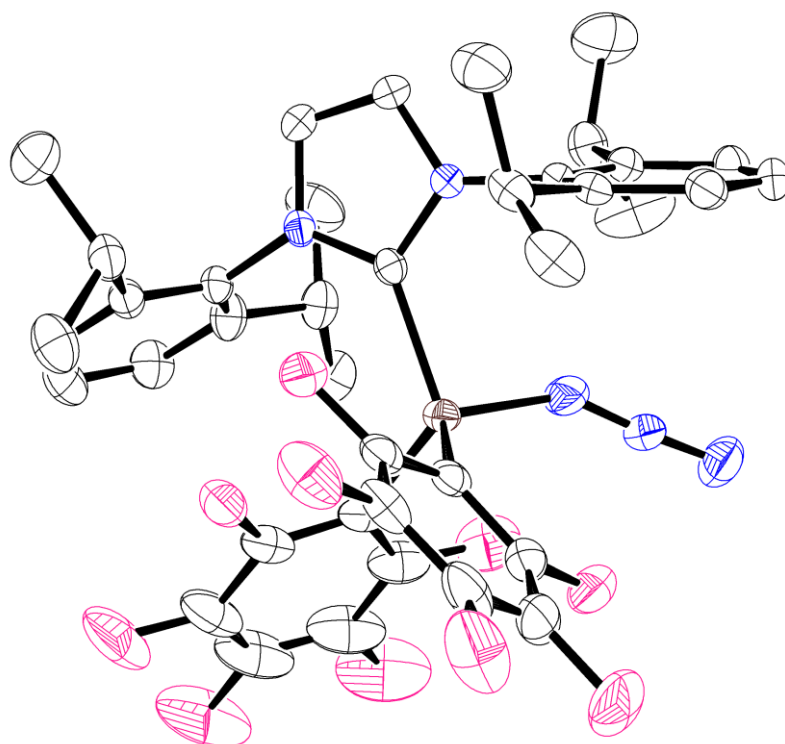

Figure S3-6. Solid-state structures of **6**. Hydrogen atoms are omitted for clarity. Thermal ellipsoids are set at the 50% probability level.

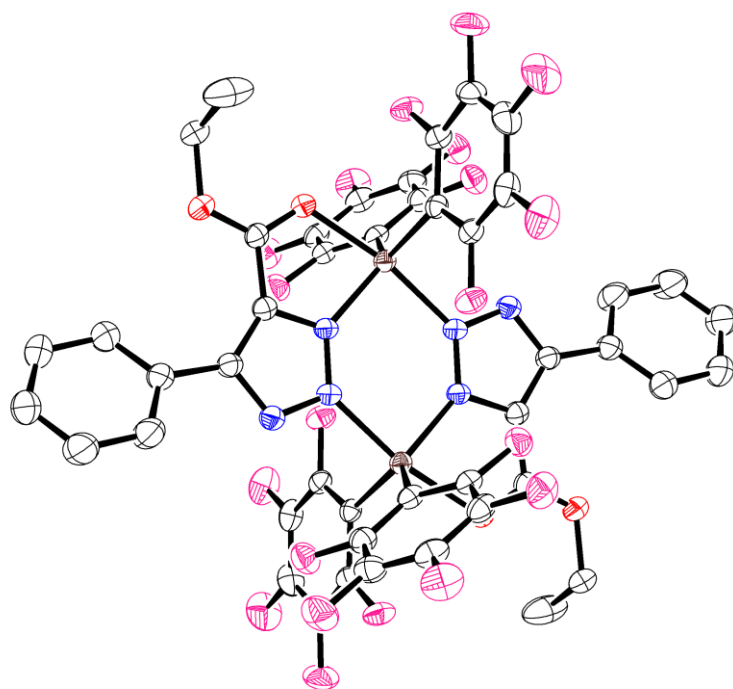

Figure S3-7. Solid-state structures of **7**. Hydrogen atoms are omitted for clarity. Thermal ellipsoids are set at the 50% probability level.

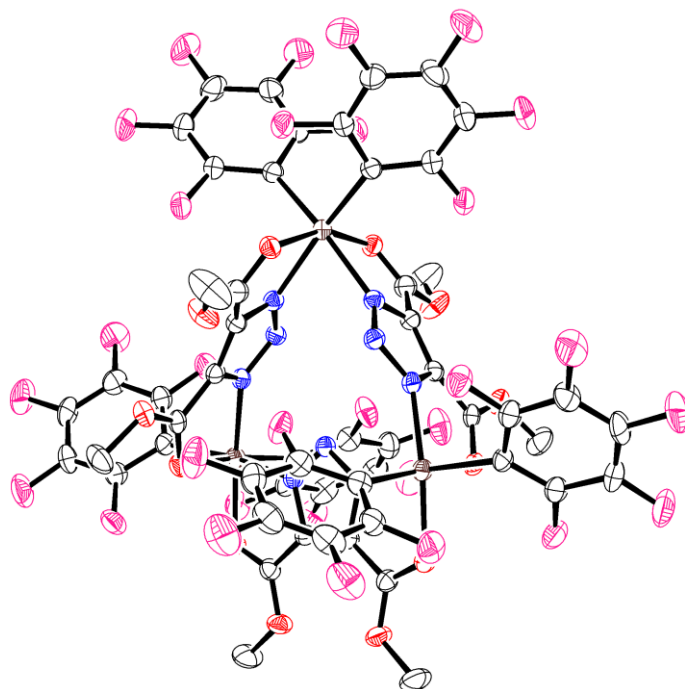

Figure S3-8. Solid-state structures of **8**. Hydrogen atoms are omitted for clarity. Thermal ellipsoids are set at the 50% probability level.

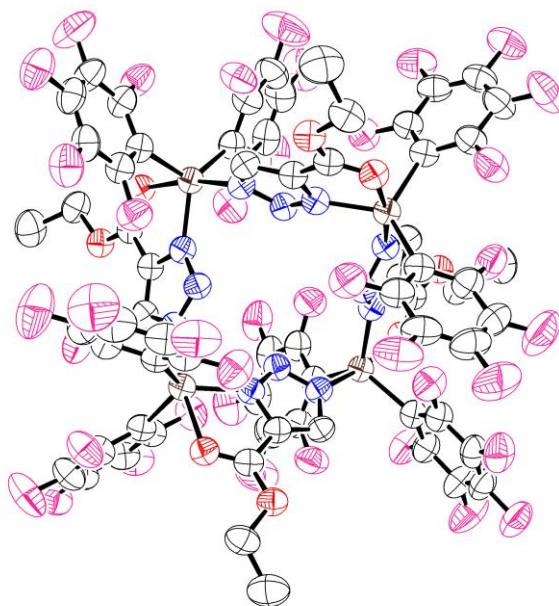

Figure S3-9. Solid-state structures of **9**. Hydrogen atoms are omitted for clarity. Thermal ellipsoids are set at the 50% probability level.

## Computational Details

Geometry optimizations were carried out with the Gaussian 16 package<sup>[S8]</sup> with the M06-2X functional and the def2-SVP basis set. The single-point energy calculations were performed at the M06-2X/def2-TZVP level of theory for solution-phase (toluene).

The gas-phase geometry was used for all the solution phase calculations. The SMD method was used with the corresponding solvent. The corrections of Gibbs free energy from frequency calculations were added to the single-point energies to obtain the Gibbs free energy in solution, respectively. Optimized structures were visualized by the Multiwfn<sup>[9]</sup> program.

For gas phase FIA and HIA calculation, geometries and final electronic energies were obtained at the BP86-D3/def2-SVP level of theory. The FIA reaction enthalpies were calculated according to the scheme proposed by Krossing<sup>[S10]</sup> using the given G3 anchor points and isodesmic reactions. For solvent corrected (toluene) FIA ( $FIA_{\text{solv}}$ ) and HIA ( $HIA_{\text{solv}}$ ), the PCM method was used on the BP86-D3/def2-SVP-level.

Table S4-1. Energy of Intermediates for the trimerization of **2**(monomer) and **2**(dimer).

| Species            | Thermal Corrections of Gibbs Free Energies (Hartree) | Single Point Energy (Hartree) SMD (toluene) | Solvation Energies (Hartree) SMD (toluene) |
|--------------------|------------------------------------------------------|---------------------------------------------|--------------------------------------------|
| <b>2</b> (monomer) | 0.060307                                             | -1862.42849468                              | -1862.368188                               |
| <b>2</b> (dimer)   | 0.143495                                             | -3724.95521187                              | -3724.811717                               |

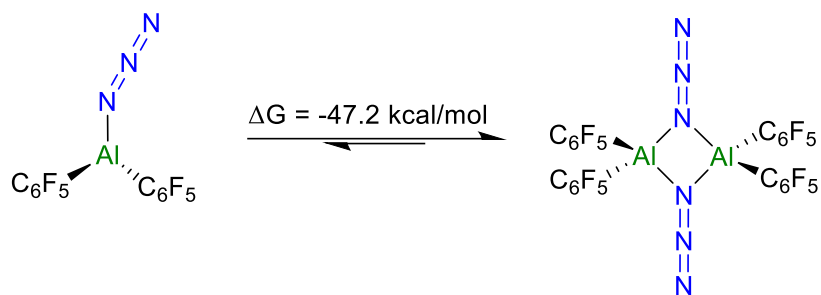

Figure S4-1. The trimerization of the monomers **2**(monomer) and **2**(dimer).

Table S4-2. Computed energies of FIAs and HIAs.

|                                                    | <b>G</b><br>(a.u.) | <b>G<sub>solv</sub></b><br>(a.u.) | <b>ΔG<sub>solv</sub></b><br>(kJ/mol) | <b>FIA</b><br>(kJ/mol) | <b>FIA<sub>solv</sub></b><br>(kJ/mol) | <b>HIA</b><br>(kJ/mol) | <b>HIA<sub>solv</sub></b><br>(kJ/mol) |
|----------------------------------------------------|--------------------|-----------------------------------|--------------------------------------|------------------------|---------------------------------------|------------------------|---------------------------------------|
| <b>SbF<sub>5</sub></b>                             | -739.254323        | -739.257384                       | -8.0366555                           | <b>483.23</b>          | <b>383.48</b>                         |                        |                                       |
| <b>SbF<sub>6</sub><sup>-</sup></b>                 | -839.181431        | -839.233795                       | -137.481682                          |                        |                                       |                        |                                       |
| <b>B(C<sub>6</sub>F<sub>5</sub>)<sub>3</sub></b>   | -2206.624189       | -2206.625571                      | -3.628441                            | <b>458.29</b>          | <b>272.65</b>                         | <b>488.09</b>          | <b>286.43</b>                         |
| <b>B(C<sub>6</sub>F<sub>5</sub>)<sub>3</sub>-F</b> | -2306.575458       | -2306.588818                      | -35.07668                            |                        |                                       |                        |                                       |
| <b>B(C<sub>6</sub>F<sub>5</sub>)<sub>3</sub>-H</b> | -2207.346414       | -2207.359579                      | -34.5647075                          |                        |                                       |                        |                                       |
| <b>2(monomer)</b>                                  | -1861.055953       | -1861.058681                      | -7.162364                            | <b>544.31</b>          | <b>405.04</b>                         | <b>487.96</b>          | <b>330.66</b>                         |
| <b>2-F</b>                                         | -1961.01058        | -1961.042945                      | -84.9743075                          |                        |                                       |                        |                                       |
| <b>2-H</b>                                         | -1861.750005       | -1861.781413                      | -82.461704                           |                        |                                       |                        |                                       |
| <b>2(dimer)</b>                                    | -3722.189903       | -3722.189903                      | -13.458313                           | <b>545.1</b>           | <b>387.62</b>                         | <b>487.66</b>          | <b>324.49</b>                         |
| <b>2-F</b>                                         | -3822.139918       | -3822.139918                      | -73.0702905                          |                        |                                       |                        |                                       |
| <b>2-H</b>                                         | -3722.879106       | -3722.879106                      | -67.3782065                          |                        |                                       |                        |                                       |
| <b>F<sup>-</sup></b>                               | -99.698735         | -99.781419                        | -217.086842                          |                        |                                       |                        |                                       |
| <b>H<sup>-</sup></b>                               | -0.498737          | -0.58733                          | -232.6009215                         |                        |                                       |                        |                                       |

G values are calculated at BP86-D3/def2-SVP level;

G<sub>solv</sub> values are calculated at PCMBP86-D3/def2-SVP level.

Table S4-3. The Optimized structures of **2**(monomer) and **2**(dimer) and **3**.

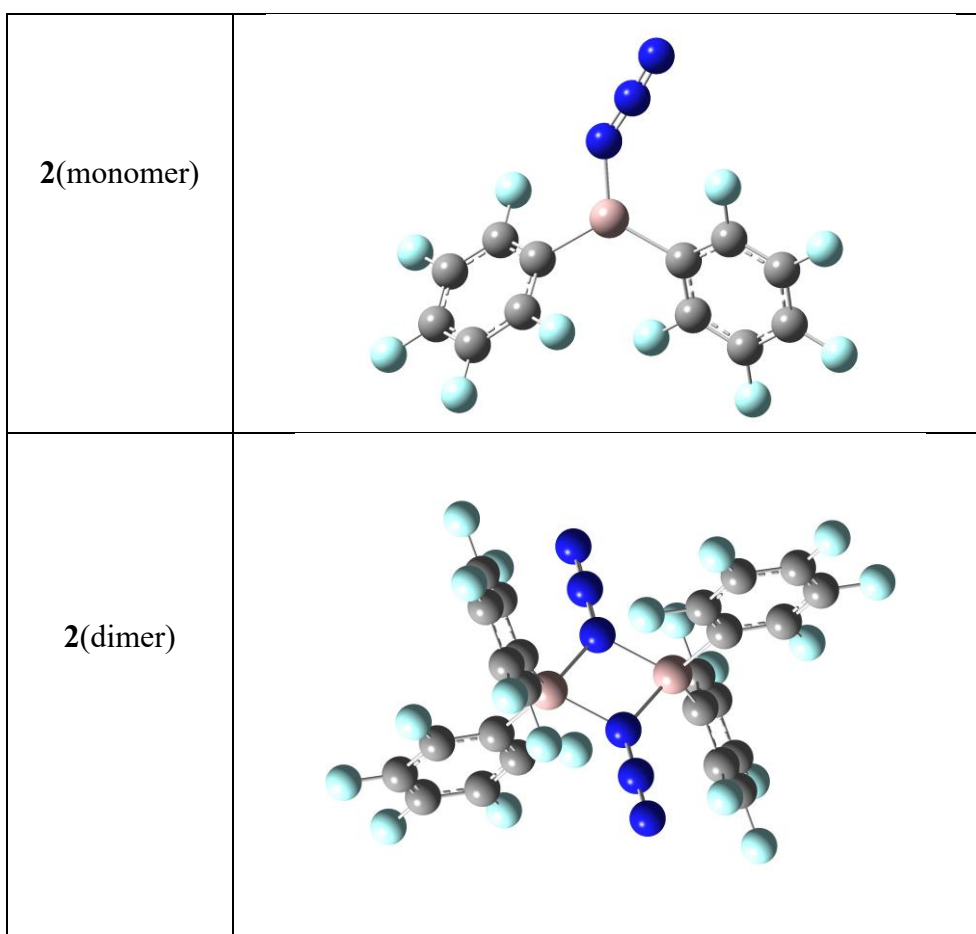

## Reference

- [S1] G. S. Hair, A. H. Cowley, R. A. Jones, B. G. McBurnett, A. Voigt, *J. Am. Chem. Soc.* 1999, **121**, 4922-4923.
- [S2] J. Tan, C. Hu, X. Yang, S. Ju, L. Cao, Y. Wu, L. L. Liu and D. W. Stephan, *Chem. Commun.*, 2023,**59**, 282-285.
- [S3] F. E. Hahn and M. C. Jahnke, *Angew. Chem. Int. Ed.* 2008, **47**, 3122-3172.
- [S4] O. V. Dolomanov, L. J. Bourhis, R. J. Gildea, J. A. K. Howard and H. Puschmann, *J. Appl. Crystallogr.*, 2009, **42**, 339-341.
- [S5] G. Sheldrick, *Acta Crystallogr. Sect. A.*, 2015, **71**, 3-8.
- [S6] G. Sheldrick, *Acta Crystallogr. Sect. A.*, 2008, **64**, 112-122.
- [S7] V. Gutmann, *Coord. Chem. Rev.*, 1976, **18**, 225-255.
- [S8] Gaussian 16, Revision C.01, M. J. Frisch, G. W. Trucks, H. B. Schlegel, G. E. Scuseria,; M. A. Robb, J. R. Cheeseman, G. Scalmani, V. Barone,; G. A. Petersson, H. Nakatsuji, X. Li, M. Caricato, A. V. Marenich,; J. Bloino, B. G. Janesko, R. Gomperts, B. Mennucci, H. P. Hratchian,; J. V. Ortiz, A. F. Izmaylov, J. L. Sonnenberg, D. Williams-Young,; F. Ding, F. Lipparini, F. Egidi, J. Goings, B. Peng, A. Petrone,; T. Henderson, D. Ranasinghe, V. G. Zakrzewski, J. Gao, N. Rega,;



G. Zheng, W. Liang, M. Hada, M. Ehara, K. Toyota, R. Fukuda,; J. Hasegawa, M. Ishida, T. Nakajima, Y. Honda, O. Kitao, H. Nakai,; T. Vreven, K. Throssell, J. A. Montgomery, Jr., J. E. Peralta,; F. Ogliaro, M. J. Bearpark, J. J. Heyd, E. N. Brothers, K. N. Kudin,; V. N. Staroverov, T. A. Keith, R. Kobayashi, J. Normand,; K. Raghavachari, A. P. Rendell, J. C. Burant, S. S. Iyengar,; J. Tomasi, M. Cossi, J. M. Millam, M. Klene, C. Adamo, R. Cammi,; J. W. Ochterski, R. L. Martin, K. Morokuma, O. Farkas,; J. B. Foresman, and D. J. Fox, Gaussian, Inc., Wallingford CT, 2019.

[S9] T. Lu, F. Chen, *J. Comput. Chem.*, 33, 580-592 (2012)

[S10] a) H. Böhler, N. Trapp, D. Himmel, M. Schleep and I. Krossing, *Dalton Trans.*, 2015, **44**, 7489-7499; b) P. Erdmann, J. Leitner, J. Schwarz and L. Greb, *Chem, Phys, Chem.*, 2020, **21**, 987-994.

## Cartesian Coordinates of the Optimized Geometries

**2(monomer) (BP86-D3/Def2-SVP)**

**SCF Done: E(RB-P86) = -1861.10658482 A.U.**

|    |             |             |             |
|----|-------------|-------------|-------------|
| Al | -0.02476100 | 1.24427000  | -0.04418200 |
| F  | 0.95708000  | -1.10495400 | -1.73232600 |
| F  | -3.02559100 | 1.84281500  | -0.82974200 |
| F  | 3.38702800  | -2.37441600 | -1.83522900 |
| F  | 5.44320600  | -1.48632700 | -0.26200900 |
| F  | 2.66433100  | 1.89547500  | 1.53528600  |
| F  | 5.09343100  | 0.64434400  | 1.41629100  |
| F  | -5.03480200 | -2.25963900 | 0.38277500  |
| F  | -0.40290800 | -1.64134100 | 1.08905000  |
| F  | -2.62232700 | -3.21669200 | 1.24689000  |
| C  | -1.63974400 | 0.15250500  | 0.12070400  |
| C  | 1.74802700  | 0.43444500  | -0.10383300 |
| C  | -2.89961200 | 0.60575200  | -0.30815200 |
| C  | 1.96667900  | -0.66632500 | -0.94617200 |
| C  | 4.25985700  | -0.87313100 | -0.21089600 |
| C  | -3.95028300 | -1.48930100 | 0.29858900  |
| C  | -4.05627500 | -0.18814700 | -0.23127500 |
| C  | 3.20031700  | -1.33179500 | -1.01945500 |
| C  | 2.82496300  | 0.85937500  | 0.68868400  |
| C  | -1.57848000 | -1.15132200 | 0.64458400  |
| C  | 4.08000000  | 0.22734700  | 0.65043100  |
| C  | -2.70673200 | -1.98218500 | 0.74138500  |
| F  | -5.24166800 | 0.26477300  | -0.65030300 |

|   |             |            |             |
|---|-------------|------------|-------------|
| N | -0.11654400 | 3.02621200 | -0.17634700 |
| N | -0.89647100 | 3.96290600 | -0.21836700 |
| N | -1.57704500 | 4.89157400 | -0.26519400 |

**2(monomer)-F (BP86-D3/Def2-SVP)**

**SCF Done: E(RB-P86) = -1961.06173833 A.U.**

|    |             |             |             |
|----|-------------|-------------|-------------|
| Al | 0.01170900  | 1.44407700  | -0.55310300 |
| F  | -0.58795200 | -0.73676000 | 1.64315400  |
| F  | 3.06215000  | 1.87240700  | 0.40219800  |
| F  | -2.82066300 | -2.15712200 | 2.26584600  |
| F  | -5.14301500 | -1.74775300 | 0.85889700  |
| F  | -2.99903900 | 1.51670500  | -1.80523200 |
| F  | -5.21863500 | 0.09271800  | -1.17473700 |
| F  | 4.79683200  | -2.50676900 | -0.03624400 |
| F  | 0.30450100  | -1.65366700 | -1.25276700 |
| F  | 2.37983600  | -3.39105400 | -0.98967700 |
| C  | 1.58826200  | 0.17793900  | -0.41235500 |
| C  | -1.69036400 | 0.44080500  | -0.11787600 |
| C  | 2.84280200  | 0.58169800  | 0.05920600  |
| C  | -1.70865300 | -0.50453300 | 0.91503000  |
| C  | -4.03622100 | -1.04701500 | 0.54633400  |
| C  | 3.76814800  | -1.64618000 | -0.15698600 |
| C  | 3.93404300  | -0.29677900 | 0.19931200  |
| C  | -2.84560400 | -1.25435500 | 1.26441700  |
| C  | -2.89966000 | 0.61677900  | -0.80121800 |
| C  | 1.47488800  | -1.17212200 | -0.76411700 |
| C  | -4.07021800 | -0.10427100 | -0.49476900 |
| C  | 2.52821300  | -2.09603500 | -0.64339300 |
| F  | 5.12928100  | 0.12640000  | 0.65777000  |
| N  | 0.11605600  | 2.76520500  | 0.75668300  |
| N  | 0.80965400  | 3.69072600  | 1.11132600  |
| N  | 1.42983800  | 4.59196000  | 1.50631100  |
| F  | -0.00939200 | 2.10891400  | -2.12380800 |

**2(monomer)-H (BP86-D3/Def2-SVP)**

**SCF Done: E(RB-P86) = -1861.80639092 A.U.**

|    |             |             |             |
|----|-------------|-------------|-------------|
| Al | 0.01438400  | 1.50610300  | -0.77825000 |
| F  | -0.58868000 | -0.50504400 | 1.61880000  |

|   |             |             |             |
|---|-------------|-------------|-------------|
| F | 3.06933100  | 1.97595600  | 0.12446300  |
| F | -2.81910700 | -1.87451200 | 2.34603400  |
| F | -5.13205700 | -1.60285500 | 0.89291100  |
| F | -2.98150700 | 1.42509200  | -2.03503500 |
| F | -5.20096400 | 0.05031000  | -1.29743200 |
| F | 4.79176500  | -2.43073100 | 0.06872700  |
| F | 0.29373500  | -1.67773600 | -1.19260100 |
| F | 2.36528400  | -3.38846700 | -0.78760400 |
| C | 1.58287000  | 0.22057400  | -0.52156800 |
| C | -1.68139200 | 0.51037700  | -0.24780700 |
| C | 2.84307200  | 0.65876200  | -0.09804500 |
| C | -1.70272500 | -0.34069700 | 0.86423700  |
| C | -4.02625600 | -0.92576800 | 0.52765800  |
| C | 3.76349400  | -1.58107500 | -0.12049000 |
| C | 3.93402800  | -0.20569800 | 0.11279300  |
| C | -2.83976300 | -1.06245000 | 1.26919800  |
| C | -2.88692600 | 0.61814500  | -0.95108600 |
| C | 1.46719900  | -1.15496800 | -0.75228700 |
| C | -4.05690100 | -0.07954200 | -0.59332700 |
| C | 2.51925800  | -2.06779200 | -0.55757600 |
| F | 5.13382100  | 0.25428600  | 0.52314400  |
| N | 0.12528200  | 2.87492500  | 0.50263400  |
| N | 0.78123100  | 3.85546300  | 0.76879000  |
| N | 1.36980200  | 4.81040000  | 1.08109600  |
| H | -0.00154800 | 2.05924000  | -2.29324800 |

**2(dimer) (BP86-D3/Def2-SVP)**

**SCF Done: E(RB-P86) = -3722.31636893 A.U.**

|    |             |             |             |
|----|-------------|-------------|-------------|
| Al | 0.81469100  | -1.24265400 | 0.00002500  |
| F  | 1.93950600  | -4.21004400 | 0.00132900  |
| F  | 2.82534500  | -1.08238900 | 2.37373800  |
| F  | 0.62591800  | -6.59357800 | 0.00130700  |
| F  | -2.10996000 | -6.64586000 | 0.00007100  |
| F  | -2.24016700 | -1.91997800 | -0.00118600 |
| F  | -3.54393300 | -4.31147900 | -0.00119600 |
| F  | 6.90040200  | -0.58486600 | -0.00075100 |
| F  | 2.82474800  | -1.08272000 | -2.37414100 |

|    |             |             |             |
|----|-------------|-------------|-------------|
| F  | 5.55387500  | -0.74877300 | -2.37839900 |
| N  | -0.00007800 | -0.00006300 | -1.27568800 |
| N  | -0.00062400 | -0.00056000 | -2.51228000 |
| N  | -0.00109200 | -0.00102000 | -3.65563300 |
| C  | 2.76615900  | -1.09325100 | -0.00019000 |
| C  | -0.10389000 | -2.98051800 | 0.00001700  |
| C  | 3.48935200  | -1.00416100 | 1.19245600  |
| C  | 0.59133400  | -4.20165800 | 0.00068000  |
| C  | -1.47003900 | -5.47571900 | 0.00006000  |
| C  | 5.57549800  | -0.74716700 | -0.00056700 |
| C  | 4.88239900  | -0.83210200 | 1.22388800  |
| C  | -0.06204500 | -5.44707700 | 0.00068300  |
| C  | -1.50622100 | -3.05816500 | -0.00058200 |
| C  | 3.48905000  | -1.00432400 | -1.19303800 |
| C  | -2.20698600 | -4.27483600 | -0.00060500 |
| C  | 4.88209000  | -0.83227600 | -1.22483800 |
| F  | 5.55446400  | -0.74842800 | 2.37727200  |
| Al | -0.81469100 | 1.24265500  | -0.00002600 |
| F  | -1.93950600 | 4.21004500  | -0.00131800 |
| F  | -2.82534600 | 1.08238900  | -2.37373800 |
| F  | -0.62591800 | 6.59357900  | -0.00129600 |
| F  | 2.10996000  | 6.64586000  | -0.00007100 |
| F  | 2.24016600  | 1.91997800  | 0.00117500  |
| F  | 3.54393300  | 4.31147900  | 0.00118600  |
| F  | -6.90040200 | 0.58486600  | 0.00075200  |
| F  | -2.82474700 | 1.08271900  | 2.37414100  |
| F  | -5.55387500 | 0.74877200  | 2.37840000  |
| N  | 0.00007800  | 0.00006500  | 1.27568700  |
| N  | 0.00062600  | 0.00056100  | 2.51227800  |
| N  | 0.00109000  | 0.00101600  | 3.65563100  |
| C  | -2.76615900 | 1.09325100  | 0.00019000  |
| C  | 0.10389000  | 2.98051800  | -0.00001700 |
| C  | -3.48935300 | 1.00416100  | -1.19245600 |
| C  | -0.59133400 | 4.20165800  | -0.00067500 |
| C  | 1.47004000  | 5.47571900  | -0.00005900 |

|   |             |            |             |
|---|-------------|------------|-------------|
| C | -5.57549800 | 0.74716700 | 0.00056800  |
| C | -4.88240000 | 0.83210200 | -1.22388700 |
| C | 0.06204500  | 5.44707800 | -0.00067700 |
| C | 1.50622000  | 3.05816500 | 0.00057700  |
| C | -3.48904900 | 1.00432400 | 1.19303800  |
| C | 2.20698600  | 4.27483600 | 0.00060000  |
| C | -4.88208900 | 0.83227500 | 1.22483900  |
| F | -5.55446500 | 0.74842900 | -2.37727200 |

**2(dimer)-F (BP86-D3/Def2-SVP)**

**SCF Done: E(RB-P86) = -3822.27203550 A.U.**

|    |             |             |             |
|----|-------------|-------------|-------------|
| Al | 1.10025600  | -1.52318400 | -1.61463500 |
| F  | 2.64123100  | -3.97370600 | -0.58648300 |
| F  | -1.82252200 | -1.70644900 | -2.55384700 |
| F  | 5.01613900  | -4.23956900 | 0.74465000  |
| F  | 6.54852300  | -2.02181300 | 1.25028300  |
| F  | 3.33557900  | 0.73270200  | -0.86179900 |
| F  | 5.70044100  | 0.45838300  | 0.44605900  |
| F  | -3.97838000 | -3.75062900 | 1.11747100  |
| F  | 0.68257500  | -3.00306300 | 1.29072000  |
| F  | -1.58982500 | -3.91103200 | 2.45706700  |
| N  | 0.90468300  | -0.03664600 | 1.07679600  |
| N  | 1.76714000  | -0.17477200 | 1.91084000  |
| N  | 2.59724600  | -0.36752600 | 2.69620800  |
| C  | -0.46949300 | -2.35708300 | -0.69896200 |
| C  | 2.89156900  | -1.61341900 | -0.75073000 |
| C  | -1.71788500 | -2.28684000 | -1.33383000 |
| C  | 3.37171600  | -2.85967300 | -0.33299800 |
| C  | 5.37785600  | -1.89190000 | 0.60513700  |
| C  | -2.85265600 | -3.30982000 | 0.53605400  |
| C  | -2.90436200 | -2.76415200 | -0.75765100 |
| C  | 4.58769400  | -3.02677500 | 0.35043100  |
| C  | 3.71486000  | -0.51310900 | -0.48616700 |
| C  | -0.46437900 | -2.91195200 | 0.58803700  |
| C  | 4.94024200  | -0.62078600 | 0.19447800  |
| C  | -1.62703900 | -3.39173200 | 1.21891800  |
| F  | -4.08797500 | -2.67180100 | -1.39403200 |

|    |             |             |             |
|----|-------------|-------------|-------------|
| Al | -0.12943200 | 1.03841000  | 0.02471900  |
| F  | -2.44949500 | 1.48801900  | -1.96299700 |
| F  | -0.99345500 | 2.93389600  | 2.24176500  |
| F  | -5.08277900 | 0.74270800  | -1.91609000 |
| F  | -6.09400500 | -0.53576900 | 0.29021200  |
| F  | -1.85722100 | -0.38992900 | 2.37521200  |
| F  | -4.47144400 | -1.09505200 | 2.42796800  |
| F  | 0.75560700  | 7.10444500  | 0.84078200  |
| F  | 1.46546200  | 3.26685800  | -1.82635900 |
| F  | 1.81006000  | 5.92555500  | -1.39623100 |
| N  | 0.45430900  | 0.35843300  | -1.70807500 |
| N  | 0.28202600  | 0.89324200  | -2.80909600 |
| N  | 0.13285700  | 1.38396500  | -3.83288400 |
| C  | 0.21334200  | 2.99984800  | 0.19026700  |
| C  | -2.05615600 | 0.56773200  | 0.19461300  |
| C  | -0.30376600 | 3.64871600  | 1.31997200  |
| C  | -2.92551200 | 0.83992500  | -0.86710200 |
| C  | -4.80246900 | -0.17651300 | 0.26046900  |
| C  | 0.58123700  | 5.78998700  | 0.63385800  |
| C  | -0.14124600 | 5.02273900  | 1.56578400  |
| C  | -4.28133700 | 0.47637500  | -0.87166900 |
| C  | -2.61586600 | -0.08113900 | 1.30148500  |
| C  | 0.92719000  | 3.80224500  | -0.70867000 |
| C  | -3.96877100 | -0.46145300 | 1.35546100  |
| C  | 1.12185000  | 5.18222100  | -0.51338300 |
| F  | -0.65225500 | 5.61065900  | 2.66106800  |
| F  | 1.21615600  | -1.90613100 | -3.27102300 |

**2(dimer)-H (BP86-D3/Def2-SVP)**

**SCF Done: E(RB-P86) = -3723.01635461 A.U.**

|    |             |             |             |
|----|-------------|-------------|-------------|
| Al | -1.28710100 | -1.37834800 | 1.82037900  |
| F  | -3.06018400 | -3.68228400 | 0.86425200  |
| F  | 1.61017700  | -1.92424800 | 2.65922400  |
| F  | -5.43748300 | -3.77843600 | -0.48567100 |
| F  | -6.73082200 | -1.44670000 | -1.13271800 |
| F  | -3.27479700 | 1.07891700  | 0.87748100  |
| F  | -5.64020700 | 0.97445500  | -0.44640400 |

|    |             |             |             |
|----|-------------|-------------|-------------|
| F  | 3.40675400  | -4.23641000 | -1.04760700 |
| F  | -1.11879100 | -2.89413400 | -1.13248500 |
| F  | 0.99032500  | -4.08612000 | -2.33645100 |
| N  | -0.93865100 | 0.07150600  | -1.13458100 |
| N  | -1.87173300 | -0.01649200 | -1.89332600 |
| N  | -2.76518800 | -0.15432700 | -2.61952000 |
| C  | 0.14698000  | -2.38827300 | 0.83218500  |
| C  | -3.06584300 | -1.30323300 | 0.89666100  |
| C  | 1.40725900  | -2.48397100 | 1.43970200  |
| C  | -3.67071500 | -2.51333300 | 0.53867200  |
| C  | -5.55875000 | -1.40120400 | -0.47810900 |
| C  | 2.36085000  | -3.64999900 | -0.44572500 |
| C  | 2.50968700  | -3.11376400 | 0.84441600  |
| C  | -4.89104200 | -2.59490200 | -0.15102400 |
| C  | -3.77223500 | -0.14247100 | 0.56241000  |
| C  | 0.04318800  | -2.94313200 | -0.45130500 |
| C  | -4.99738800 | -0.16169400 | -0.12758900 |
| C  | 1.12105000  | -3.57206900 | -1.10240400 |
| F  | 3.70706000  | -3.17785700 | 1.45863500  |
| Al | 0.19249000  | 0.98014400  | -0.03843900 |
| F  | 2.52385800  | 1.15938700  | 1.99485400  |
| F  | 1.60899400  | 2.78843800  | -2.07286000 |
| F  | 5.05119700  | 0.12110000  | 1.98850400  |
| F  | 5.94136900  | -1.28258300 | -0.19447500 |
| F  | 1.77601200  | -0.67757400 | -2.33875400 |
| F  | 4.29331300  | -1.67219300 | -2.35100500 |
| F  | 0.19419600  | 7.12476700  | -0.81550400 |
| F  | -1.38302100 | 3.37712000  | 1.59249900  |
| F  | -1.32602200 | 6.06033100  | 1.20139100  |
| N  | -0.46296800 | 0.44953000  | 1.73120700  |
| N  | -0.26067800 | 1.08115200  | 2.77359600  |
| N  | -0.08141000 | 1.65782000  | 3.74809300  |
| C  | 0.12969800  | 2.97446700  | -0.21230600 |
| C  | 2.04940000  | 0.26732100  | -0.16067200 |
| C  | 0.88391600  | 3.56769800  | -1.23505400 |

|   |             |             |             |
|---|-------------|-------------|-------------|
| C | 2.93159200  | 0.44901000  | 0.91026500  |
| C | 4.69755900  | -0.78089700 | -0.18460300 |
| C | 0.17374800  | 5.79643500  | -0.62379800 |
| C | 0.92982500  | 4.95458200  | -1.45916400 |
| C | 4.23824700  | -0.06379600 | 0.93496000  |
| C | 2.54850300  | -0.44945300 | -1.25480400 |
| C | -0.61231700 | 3.85193400  | 0.58952500  |
| C | 3.85096400  | -0.97904200 | -1.28857000 |
| C | -0.60471800 | 5.24770600  | 0.41052100  |
| F | 1.66699200  | 5.48563400  | -2.45013500 |
| H | -1.39267400 | -1.65968500 | 3.39643200  |

**SbF<sub>5</sub> (BP86-D3/Def2-SVP)**

**SCF Done: E(RB-P86) = -739.231044542 A.U.**

|    |             |             |             |
|----|-------------|-------------|-------------|
| Sb | 0.00000200  | 0.00013600  | 0.00000000  |
| F  | 0.00000200  | 0.00340300  | 1.92298800  |
| F  | 0.00753400  | 1.91467900  | 0.00000000  |
| F  | 0.00000200  | 0.00340300  | -1.92298800 |
| F  | 1.65161100  | -0.96762500 | 0.00000000  |
| F  | -1.65916100 | -0.95463100 | 0.00000000  |

**SbF<sub>6</sub><sup>-</sup> (BP86-D3/Def2-SVP)**

BP86-D3/Def2-SVP

SCF Done: E(RB-P86) = -839.163326436 A.U.

|    |             |             |             |
|----|-------------|-------------|-------------|
| Sb | 0.00000000  | 0.00000000  | 0.00000000  |
| F  | 0.00000000  | 0.00000000  | 1.95131100  |
| F  | 0.00000000  | 0.00000000  | -1.95131100 |
| F  | 0.00000000  | 1.95131100  | 0.00000000  |
| F  | -1.95131100 | 0.00000000  | 0.00000000  |
| F  | 0.00000000  | -1.95131100 | 0.00000000  |
| F  | 1.95131100  | 0.00000000  | 0.00000000  |

**B(C<sub>6</sub>F<sub>5</sub>)<sub>3</sub> (BP86-D3/Def2-SVP)**

**SCF Done: E(RB-P86) = -2206.70915384 A.U.**

|   |             |            |             |
|---|-------------|------------|-------------|
| B | -0.00016400 | 0.00084300 | 0.00000800  |
| C | 1.31541200  | 0.85374600 | 0.00000100  |
| C | 2.45984600  | 0.46155500 | -0.73047600 |
| C | 1.42556600  | 2.05828500 | 0.73087000  |
| C | 3.64318400  | 1.21537100 | -0.75114100 |



|   |             |             |             |
|---|-------------|-------------|-------------|
| C | 2.59736100  | 2.82994400  | 0.75150600  |
| C | 3.70931300  | 2.40426600  | 0.00010200  |
| C | 0.08096500  | -1.56491700 | 0.00018800  |
| C | -0.83000900 | -2.36047100 | -0.73081600 |
| C | 1.06953000  | -2.26192000 | 0.73095300  |
| C | -0.76797900 | -3.76213900 | -0.75144800 |
| C | 1.15273500  | -3.66250700 | 0.75169300  |
| C | 0.22865500  | -4.41324200 | 0.00021700  |
| C | -1.39684300 | 0.71318600  | 0.00020100  |
| C | -2.49454900 | 0.20514100  | 0.73095000  |
| C | -1.63082000 | 1.89961000  | -0.73108900 |
| C | -3.74943500 | 0.83270400  | 0.75140400  |
| C | -2.87605000 | 2.54609300  | -0.75196900 |
| C | -3.93805600 | 2.00811100  | -0.00031900 |
| F | -1.63559100 | -4.48104200 | -1.47026300 |
| F | 0.29768100  | -5.74378800 | 0.00016900  |
| F | 2.09035600  | -4.28781800 | 1.47009900  |
| F | 1.96384600  | -1.58809900 | 1.47367300  |
| F | -1.78860400 | -1.78284400 | -1.47438000 |
| F | 2.43852400  | -0.65814100 | -1.47296100 |
| F | 0.39558900  | 2.49617100  | 1.47438600  |
| F | 2.67088200  | 3.95441500  | 1.47013400  |
| F | 4.82760600  | 3.12850700  | 0.00022000  |
| F | 4.69962200  | 0.82235400  | -1.46928000 |
| F | -2.35765000 | -0.90616900 | 1.47374000  |
| F | -0.65135000 | 2.44136100  | -1.47446700 |
| F | -3.06530400 | 3.65676200  | -1.47090200 |
| F | -5.12515300 | 2.61301300  | -0.00055500 |
| F | -4.75958000 | 0.33297500  | 1.46983100  |

**B(C<sub>6</sub>F<sub>5</sub>)<sub>3</sub>-F (BP86-D3/Def2-SVP)**

BP86-D3/Def2-SVP

SCF Done: E(RB-P86) = -2306.63094768 A.U.

|   |             |             |             |
|---|-------------|-------------|-------------|
| B | -0.09818500 | -0.05987500 | -0.93680500 |
| C | 0.39594200  | 1.42673700  | -0.36800000 |
| C | -0.18350800 | 2.16971800  | 0.67219100  |
| C | 1.55101900  | 1.99503800  | -0.93542500 |

|   |             |             |             |
|---|-------------|-------------|-------------|
| C | 0.31014800  | 3.41571200  | 1.10285900  |
| C | 2.08110200  | 3.23749000  | -0.54120300 |
| C | 1.45381600  | 3.95209200  | 0.49172400  |
| C | -1.64324200 | -0.44943800 | -0.48245700 |
| C | -2.05746400 | -1.65502400 | 0.10245400  |
| C | -2.68138300 | 0.44365300  | -0.80398900 |
| C | -3.40498300 | -1.95472000 | 0.38860200  |
| C | -4.03786900 | 0.19103400  | -0.54206300 |
| C | -4.40188100 | -1.02512300 | 0.06009400  |
| C | 1.04008800  | -1.12251400 | -0.36859000 |
| C | 1.85159900  | -1.92721900 | -1.18482000 |
| C | 1.30680500  | -1.20474600 | 1.00807100  |
| C | 2.87204600  | -2.75402300 | -0.67064400 |
| C | 2.30718500  | -2.01533400 | 1.56742700  |
| C | 3.10325900  | -2.79561000 | 0.71222100  |
| F | -3.74895200 | -3.12909000 | 0.95634300  |
| F | -5.69660600 | -1.29487400 | 0.31773000  |
| F | -4.99247600 | 1.08941700  | -0.85942500 |
| F | -2.40003000 | 1.63153000  | -1.38188900 |
| F | -1.17261100 | -2.62551300 | 0.42864100  |
| F | -1.27336000 | 1.72005800  | 1.33373400  |
| F | 2.22951300  | 1.34427200  | -1.90336000 |
| F | 3.18872500  | 3.74113300  | -1.12397900 |
| F | 1.94420600  | 5.14221300  | 0.89090500  |
| F | -0.29230900 | 4.09556600  | 2.10020100  |
| F | 1.69330300  | -1.96605500 | -2.52181000 |
| F | 0.55539600  | -0.49198600 | 1.88076800  |
| F | 2.51369500  | -2.05893200 | 2.89974400  |
| F | 4.07371600  | -3.58299700 | 1.21746400  |
| F | 3.62936300  | -3.51002900 | -1.49288000 |
| F | -0.10547800 | -0.02326300 | -2.36070800 |

**B(C<sub>6</sub>F<sub>5</sub>)<sub>3</sub>-H (BP86-D3/Def2-SVP)**

**SCF Done: E(RB-P86) = -2207.41087896 A.U.**

|   |             |             |             |
|---|-------------|-------------|-------------|
| B | -0.05536000 | -0.06917000 | -0.87572900 |
| C | 1.20972700  | -0.97477200 | -0.36630600 |
| C | 1.63944400  | -0.98391000 | 0.97104500  |

|   |             |             |             |
|---|-------------|-------------|-------------|
| C | 1.97987700  | -1.74795300 | -1.24992300 |
| C | 2.75959000  | -1.70077500 | 1.42445400  |
| C | 3.11187300  | -2.48205200 | -0.84541500 |
| C | 3.50503800  | -2.45403500 | 0.50173000  |
| C | 0.19459400  | 1.47332600  | -0.37493200 |
| C | -0.47342200 | 2.12520300  | 0.67473400  |
| C | 1.18716800  | 2.23870400  | -1.01414700 |
| C | -0.20875100 | 3.45420100  | 1.05556800  |
| C | 1.49218200  | 3.56714000  | -0.66723000 |
| C | 0.78636600  | 4.17922100  | 0.38148900  |
| C | -1.53022000 | -0.65762900 | -0.48694500 |
| C | -2.67587400 | 0.05178100  | -0.89654900 |
| C | -1.79776500 | -1.86892500 | 0.17239600  |
| C | -3.99211800 | -0.38182100 | -0.67087700 |
| C | -3.09929700 | -2.34884300 | 0.42159700  |
| C | -4.20601600 | -1.59836900 | -0.00096000 |
| F | -0.88501000 | 4.03607900  | 2.06805200  |
| F | 1.06062400  | 5.45141400  | 0.73516300  |
| F | 2.45147600  | 4.25801100  | -1.31886200 |
| F | 1.91041600  | 1.70505800  | -2.02365300 |
| F | -1.42869900 | 1.48971000  | 1.38953600  |
| F | 0.94585800  | -0.29758400 | 1.90749100  |
| F | 1.65769000  | -1.83159500 | -2.55839800 |
| F | 3.82404200  | -3.21068900 | -1.73099900 |
| F | 4.58515800  | -3.15068600 | 0.90934700  |
| F | 3.12796300  | -1.68218100 | 2.72239900  |
| F | -2.53875400 | 1.22920100  | -1.54876600 |
| F | -0.79525300 | -2.66620000 | 0.61221400  |
| F | -3.29398100 | -3.52086000 | 1.06187300  |
| F | -5.45974800 | -2.04010900 | 0.22725500  |
| F | -5.04984900 | 0.34677100  | -1.08515800 |
| H | -0.02498300 | -0.04416700 | -2.10716200 |
